**Title:** Glycolysis upregulation is neuroprotective as a compensatory mechanism in ALS

**Authors:**

Ernesto Manzo<sup>1</sup>, Ileana Lorenzini<sup>4</sup>, Dianne Barrameda<sup>1</sup>, Abigail G. O'Conner<sup>1</sup>, Jordan M. Barrows<sup>1</sup>, Alexander Starr<sup>4</sup>, Tina Kovalik<sup>4</sup>, Benjamin E. Rabichow<sup>4</sup>, Erik M. Lehmkuhl<sup>1</sup>, Dakotah D. Shreiner<sup>1</sup>, Archi Joardar<sup>1</sup>, Jean-Charles Liévens<sup>5</sup>, Robert Bowser<sup>4</sup>, Rita Sattler<sup>4</sup>, Daniela C. Zarnescu<sup>1,2,3, \*</sup>

**Affiliations:**

1 Department of Molecular and Cellular Biology,

2 Department of Neuroscience

3 Department of Neurobiology, University of Arizona, Tucson, AZ 85721, USA

4 Neurology, Barrow Neurological Institute, Phoenix, AZ

5 Université de Montpellier, MMDN U1198, CC105, Place Eugène Bataillon, 34095 Montpellier Cedex 5, France.

\* corresponding author

## Abstract

Amyotrophic Lateral Sclerosis (ALS), is a fatal neurodegenerative disorder, with TDP-43 inclusions as a major pathological hallmark. Using a *Drosophila* model of TDP-43 proteinopathy we found significant alterations in glucose metabolism including increased pyruvate, suggesting that modulating glycolysis may be neuroprotective. Indeed, a high sugar diet improves locomotor and lifespan defects caused by TDP-43 proteinopathy in motor neurons or glia, but not muscle, suggesting that metabolic dysregulation occurs in the nervous system. Overexpressing human glucose transporter GLUT-3 in motor neurons mitigates TDP-43 dependent defects in synaptic vesicle recycling and improves locomotion. Furthermore, *PFK* mRNA, a key indicator of glycolysis, is upregulated in flies and patient derived iPSC motor neurons with TDP-43 pathology. Surprisingly, *PFK* overexpression rescues TDP-43 induced locomotor deficits. These findings from multiple ALS models show that mechanistically, glycolysis is upregulated in degenerating motor neurons as a compensatory mechanism and suggest that increased glucose availability is protective.

## Introduction

Amyotrophic lateral sclerosis (ALS) is a neurodegenerative disease affecting upper and lower motor neurons resulting in progressive muscle weakness and eventual death (Hardiman et al., 2017). Cellular metabolic defects arise early, and contribute to the clinical manifestation of systemic defects that include weight loss, dyslipidemia, and hypermetabolism (reviewed in (Dupuis et al., 2011; Joardar et al., 2017). However, it is unclear how metabolic defects relate, or may contribute to motor neuron degeneration.

Observations from both patients and animal models have begun to elucidate the mechanisms that contribute to metabolic defects in ALS. Interestingly, the human brain relies on glucose as its major energy source, and consumes ~20% of the body's glucose derived energy (Mergenthaler et al., 2013). Glucose metabolism defects have been previously reported in the frontal lobe and the cortex of ALS patients (Ludolph et al., 1992), and in mutant SOD1 mouse models of ALS (Browne et al., 2006; Miyazaki et al., 2012). Increasing glucose availability has been shown to reduce protein misfolding and delay neuronal degeneration in *C. elegans* models of neurodegeneration (Tauffenberger et al., 2012). In a recent pilot study, a high caloric diet based on high carbohydrate content has been shown to be well tolerated by patients, and reduce serious adverse events in ALS patients (Wills et al., 2014b). Taken together, these findings suggest that although defective glucose metabolism is still poorly understood in ALS, there lies a great opportunity to better understand its relationship to disease and explore its potential as a therapeutic avenue.

Our lab has developed a *Drosophila* model of ALS based on overexpression of human TDP-43 that recapitulates multiple disease aspects including cytoplasmic aggregates, neuromuscular junction (NMJ) abnormalities, lifespan, and locomotor defects (Estes et al., 2011, 2013). Importantly, the large majority of ALS patients (>97%) harbor TDP-43 cytoplasmic aggregates regardless of etiology, highlighting the importance of understanding TDP-43 toxicity mechanisms (Ling et al., 2013; Neumann et al., 2006). Here, we report that in a *Drosophila* model of TDP-43 proteinopathy, glycolytic metabolites and genes are altered, and are consistent with increased glucose consumption. Moreover, key genes responsible for driving glucose metabolism

are upregulated in both patient derived induced pluripotent stem cell (iPSC) motor neurons and postmortem patient spinal cord tissue. In a fly model of TDP-43 proteinopathy, increased dietary glucose improves locomotor function and increases lifespan when TDP-43 is expressed in the central nervous system but not muscles. Additionally, genetic over-expression of human glucose transporters improves locomotor function, mitigates neuromuscular junction defects, and improves lifespan in a variant dependent manner. Finally, motor neuron overexpression of *PFK*, the rate limiting enzyme in glycolysis, improves locomotor function, suggesting that upregulation of glycolysis is neuroprotective through a compensatory mechanism in ALS. Together, our results show that increased glucose availability protects motor neurons and improves overall outcome in models of TDP-43 proteinopathy.

## Results

### Glycolysis and pentose phosphate pathways are altered by TDP-43 expression in motor neurons

To decipher metabolic alterations in ALS, we employed a *Drosophila* model of TDP-43 proteinopathy that recapitulates key features of the human disease including locomotor dysfunction and reduced survival (Estes et al., 2011; Estes et al., 2013). We conducted metabolomic profiling in whole third instar larvae expressing TDP-43 in motor neurons (D42>TDP-43<sup>WT</sup> or D42>TDP-43<sup>G298S</sup>) and controls (D42>w<sup>1118</sup>). These experiments showed significantly increased phosphoenolpyruvate (PEP) and pyruvate in both TDP-43<sup>WT</sup> and TDP-43<sup>G298S</sup> suggesting an increase in glucose metabolism (PEP,  $P_{\text{value}} = 0.034$  and pyruvate,  $P_{\text{value}} = 0.007$  for TDP-43<sup>WT</sup>; PEP,  $P_{\text{value}} = 0.002$  and pyruvate,  $P_{\text{value}} = 0.009$  for TDP-43<sup>G298S</sup>; see Fig.1 and Supplemental file 1). Interestingly, pyruvate does not appear increased when endogenous TDP-43 is knocked down by RNAi in motor neurons suggesting that this alteration is caused by TDP-43 proteinopathy (Figure 1 - supplemental 1). In larvae expressing TDP-43<sup>G298S</sup>, we also found a decrease in ribulose/xylulose 5-phosphate ( $P_{\text{value}} = 0.011$ ) in conjunction with increased sedoheptulose 7-phosphate ( $P_{\text{value}} = 0.008$ ) suggesting that increased glycolytic input into the Pentose Phosphate Pathway occurs in a variant dependent manner (see Fig. 1, Supplemental



file 1). Taken together these findings suggest that glucose metabolism is altered in the context of TDP-43 proteinopathy, consistent with previous reports of metabolite alterations such as increased pyruvate in plasma isolated from ALS patients (Lawton et al., 2012).

### **Key glycolysis and pentose phosphate pathway enzymes are upregulated by TDP-43 expression in motor neurons**

An increase in glycolytic metabolites suggests a possible increase in glycolysis. To test this hypothesis, we profiled the expression of multiple enzymes known to regulate flux through glycolysis and the Pentose Phosphate Pathway. Phosphofructokinase-1 (*PFK1*; *PFK* in *Drosophila*) levels are considered to be rate-limiting and control the rate of glycolysis, thus *PFK* expression provides a reliable determinant of flux for glucose breakdown (Tanner et al., 2018).

To measure the levels of *PFK* in the context of TDP-43 proteinopathy we performed qPCR in ventral nerve chords dissected from third instar larvae expressing TDP-43<sup>WT</sup> or TDP-43<sup>G298S</sup> in motor neurons (D42>TDP-43) and *w*<sup>1118</sup> controls. These experiments showed that *PFK* transcript levels are increased in the context of TDP-43<sup>WT</sup> or TDP-43<sup>G298S</sup>, albeit statistical significance was only achieved in the mutant TDP-43 (37% increase,  $P_{\text{value}} = 0.06$  for TDP-43<sup>WT</sup> and 59% increase,  $P_{\text{value}} = 0.014$  for TDP-43<sup>G298S</sup>; see Fig. 2A). These results suggest that flux through glycolysis is significantly increased in motor neurons in the context of TDP-43<sup>G298S</sup>.

Finally, glucose-6-phosphate dehydrogenase (*G6PD*; *Zw* in *Drosophila*) was selected due to its role as the commitment step for the pentose phosphate pathway (PPP). *Zw* transcript levels are increased specifically in TDP-43<sup>G298S</sup> (37% increase,  $P_{\text{value}} = 0.012$ , see Fig. 2B) but not TDP<sup>WT</sup>, consistent with increased glycolytic influx through the PPP in the context of mutant TDP-43.

### ***PFK* transcript is upregulated in human tissue**

To confirm that the changes in our *Drosophila* model of ALS have clinical relevance, we assayed the transcript levels of *PFK* in human tissues and patient derived iPSC motor neurons. Humans have three isoforms of *PFK*, namely *PFKM*, *PFKL*, and *PFKP*. Although all are present in the brain, *PFKL* is expressed at lower levels (Human Brain Transcriptome: <http://hbatlas.org/>) thus

we focused on *PFKP* and *PFKM*. For human tissues we used spinal cords isolated from ALS patients with TDP-43 proteinopathy and controls lacking neurological defects (see Supplemental file 2 for demographic information). qPCR experiments show that both *PFKP* and *PFKM* levels are significantly increased in human spinal cords (*PFKP*: 80% increase,  $P_{\text{value}} < 0.001$ ; *PFKM*: 55% increase,  $P_{\text{value}} = 0.014$ , Fig. 2C). iPSC motor neurons were derived from a patient harboring the TDP-43<sup>G298S</sup> mutation and differentiated as previously described (Coyne et al., 2017). qPCR profiling from iPSC derived motor neurons differentiated for 69-77 days (three independent differentiations, see Supplemental file 3) showed a 58% increase in *PFKP* ( $P_{\text{value}} = 0.010$ ; see Fig. 2D) and a 45% increase in *PFKM* ( $P_{\text{value}} = 0.036$ ). These experiments show that glycolysis is also upregulated in patient spinal cords and motor neurons consistent with our findings in the fly model. Similarly, *G6PD* transcript levels are increased by 49% in spinal cords of ALS patients ( $P_{\text{value}} = 0.015$ ; see Fig. 2C) and by 52% in patient derived motor neurons ( $P_{\text{value}} = 0.012$ ; see Fig. 2D).

### **TDP-43 proteinopathy alters the capacity of motor neurons to import glucose**

Our findings that TDP-43 expression in motor neurons alters glycolysis could be explained by an effect on glucose flux. To evaluate the levels of glucose in motor neurons, in the context of TDP-43 proteinopathy, we used a genetically encoded, FRET based, glucose sensor, FLII12Pglu-700 $\mu\delta 6$  (Fehr et al., 2003; Takanaga et al., 2008). The sensor comprises a bacterial glucose-sensing domain and a pair of cyan and yellow fluorescent proteins that upon glucose binding, undergoes a conformational change and allows FRET to occur (Fig. 3A). This genetically encoded sensor has been previously used in conjunction with the GAL-UAS system in *Drosophila* to detect glucose flux and distribution in various cell types within the fly ventral nerve cord (Volkenhoff et al., 2018).

Upon stimulation with glucose, neurons expressing the glucose sensor alone or together with TDP-43 showed a small but significant increase in the FRET/CFP ratio (Figs. 3B, C). TDP-43<sup>WT</sup> expressing neurons showed no significant difference in the FRET/CFP signal compared to controls (Figs. 3B, C,  $P_{\text{value}} < 0.99$ ). In contrast, TDP-43<sup>G298S</sup> expressing neurons showed a

significant increase in the FRET/CFP signal compared to controls (Figs. 3B, C,  $P_{\text{value}} < 0.001$ ). These results suggest that glucose flux is specifically enhanced in TDP-43<sup>G298S</sup> expressing neurons, and further substantiate our findings that glycolysis and the pentose phosphate pathway are significantly increased in the context of TDP-43 proteinopathy.

### **A high glucose diet mitigates neuronal and glial induced TDP-43 toxicity**

The alterations in glucose metabolism we have uncovered here could be a direct consequence of TDP-43 proteinopathy, or alternatively, could reflect a coping mechanism. To distinguish between these two scenarios, we fed TDP-43 expressing flies a high glucose diet. As we have previously shown, the neuronal or glial expression of TDP-43<sup>WT</sup> or TDP-43<sup>G298S</sup> caused locomotor defects as indicated by increased larval turning time compared to controls (Estes et al., 2011; Estes et al., 2013). Of note, a high glucose diet increased the larval turning time of control larvae, consistent with previous reports that high sugar intake induces insulin resistance and obesity in flies (Musselman et al., 2011; Na et al., 2013). In contrast, a high glucose diet improved the larval locomotor defect caused by either neuronal, or glial expression of TDP-43 (Fig. 4A and Fig. 4 – figure supplement 1). Interestingly, we found that increasing the concentration of glucose five-fold or higher rescued locomotor phenotypes caused by TDP-43 while no improvement was observed when glucose is only increased by two-fold (Fig. 4 – figure supplement 1). Next, we examined the effect of glucose on lifespan and found that the reduced survival caused by neuronal or glial expression of TDP-43<sup>WT</sup> or TDP-43<sup>G298S</sup> was also significantly improved by feeding *Drosophila* a high sugar (HS) versus a regular sugar (RS) diet (23.5 days for TDP-43<sup>WT</sup> on RS and 53 days for TDP-43<sup>WT</sup> on HS,  $P_{\text{value}} = < 0.0001$ ; 14.5 days for TDP-43<sup>G298S</sup> on RS and 41 days for TDP-43<sup>G298S</sup> on HS,  $P_{\text{value}} = < 0.0001$ ; Fig. 4B, Fig. 4 – figure supplement 2). Together, these results suggest that while a high sugar diet is detrimental to control flies, it improves key hallmarks of motor neuron disease including locomotor dysfunction and reduced survival in ALS flies.

### **Overexpression of human glucose transporters mitigate TDP-43 dependent phenotypes in neurons or glia**

Our results on a high sugar diet suggest that increased glucose availability is protective in our fly model of ALS. However, because feeding can cause systemic effects, and to further probe the role of glucose in our *Drosophila* model of ALS, we co-expressed TDP-43 and the human glucose transporter GLUT-3 in motor neurons or glia. GLUT-3 is the primary glucose transporter of mammalian neurons, and has a high capacity for glucose (Ferreira et al., 2011). Co-expression of GLUT-3 and TDP-43<sup>WT</sup> or TDP-43<sup>G298S</sup>, in either motor neurons or glia cells, improved the locomotor deficits caused by TDP-43 expression alone (Fig. 4C). Moreover, GLUT-3 expression in neurons improved the locomotor ability of adult flies expressing TDP-43<sup>WT</sup> or TDP-43<sup>G298S</sup> (as measured by negative geotaxis assays, Fig. 4 – figure supplement 3). When using the standard log-rank test for analyzing the survival data, lifespan was significantly increased when GLUT-3 was co-expressed with TDP-43<sup>G298S</sup> in motor neurons, but not glial cells (18 days for TDP-43<sup>G298S</sup> and 30 days for TDP-43<sup>G298S</sup>,  $P_{\text{value}} = <0.0001$ ). However, when using the Mantel-Cox test, which weighs earlier deaths more significantly, we found that GLUT-3 overexpression increases lifespan when TDP-43<sup>G298S</sup> is expressed in glial cells (43.5 days vs 51.5 days,  $P_{\text{value}} = 0.015$ ). GLUT-3 had no effect on lifespan when TDP-43<sup>WT</sup> was expressed in either motor neurons or glia. Importantly, GLUT3 overexpression had no effect on TDP-43 suggesting that its protective effect occurs through a mechanism independent of TDP-43 levels (see Fig. 4 – figure supplement 4). Together, these findings suggest that increased glucose availability is protective in both motor neurons and glia but to a different extent that likely reflects different metabolic capabilities of the two cell types.

Although GLUT-3 is the predominant glucose transporter in the brain, recently, the human glucose transporter GLUT-4, an insulin dependent glucose transporter expressed primarily in muscle has been shown to localize to the plasma membrane to support synaptic activity (Ashrafi et al., 2017). To test whether GLUT-4 also modulates TDP-43 proteinopathy, we co-expressed GLUT-4 and TDP-43 in either motor neurons or glia. Similar to GLUT-3, co-overexpression of GLUT-4 and TDP-43<sup>WT</sup> or TDP-43<sup>G298S</sup>, in either motor neurons or glial cells, improved the locomotor deficits caused by TDP-43 expression alone (Fig. 4 – figure supplement 5). Notably, while TDP-43 overexpression in muscle causes larval turning phenotypes, co-overexpression of either GLUT-3 or GLUT-4 in muscle does not mitigate TDP-43 dependent locomotor deficits,

suggesting that the primary metabolic defect lies in the nervous system (Fig. 4 – figure supplements 2 and 5).

### **TDP-43 dependent defects at the neuromuscular junction are rescued by GLUT-3**

We previously described defects at the *Drosophila* neuromuscular junction (NMJ) caused by neuronal expression of TDP-43. These defects include a reduction in synaptic bouton number (Coyne et al., 2014; Estes et al., 2013) and a reduction in synaptic vesicle endocytosis as indicated by FM1-43 dye uptake experiments (Coyne et al., 2017). To test whether increased GLUT-3 could also rescue morphological and functional defects at the larval NMJ, we co-expressed GLUT-3 and TDP-43 in motor neurons. Co-expression of GLUT-3 rescued NMJ size as indicated by the total number of synaptic boutons in both TDP-43<sup>WT</sup> ( $P_{\text{value}} = 0.004$ ) and TDP-43<sup>G298S</sup> ( $P_{\text{value}} = 0.023$ ) expressing larvae (Figs. 5A and 5C). Moreover, GLUT-3 overexpression partially restores synaptic vesicle endocytosis deficits caused by TDP-43 (Figs. 5B and 5D,  $P_{\text{value}} < 0.001$  for both TDP-43<sup>WT</sup> and TDP-43<sup>G298S</sup>). Taken together, these results show that GLUT-3 expression in motor neurons mitigates morphological and functional defects caused by TDP-43 at the NMJ and suggest that increased glucose availability in motor neurons is neuroprotective in ALS.

### **Neuronal co-expression of PFK rescues TDP-43 induced toxicity**

Increased *PFK* levels in conjunction with our findings that increased glucose availability is protective suggest that increased glycolysis may be compensatory. To test this hypothesis, we directly manipulated glycolysis genetically, either via *PFK* overexpression or RNAi knock-down, in the context of TDP-43 proteinopathy. Overexpression of *PFK* alone in motor neurons negatively altered locomotor activity suggesting that in normal neurons high glycolytic activity may be toxic (Fig. 6A). However, the co-expression of *PFK* with TDP-43<sup>WT</sup> or TDP-43<sup>G298S</sup> rescued locomotor defects to control levels ( $P_{\text{value}} = 0.003$  for TDP-43<sup>WT</sup> and  $P_{\text{value}} < 0.001$  for TDP-43<sup>G298S</sup>, Fig. 6A). In contrast, *PFK* RNAi knock-down had no significant effect on larval turning when expressed in motor neurons alone (53% knock-down,  $P_{\text{value}} = 0.04$ , see Materials and Methods). However, when

*PFK* was knocked down by RNAi in the context of TDP-43 proteinopathy we found that it significantly increased larval turning times for TDP-43<sup>WT</sup> albeit it had no effect on TDP-43<sup>G298S</sup> ( $P_{\text{value}} < 0.001$  for TDP-43<sup>WT</sup> and  $P_{\text{value}} = 0.767$  for TDP-43<sup>G298S</sup>, Fig. 6B). One possible interpretation for this variant dependent effect is that the metabolic deficit of TDP-43<sup>G298S</sup> is so severe that it may be difficult to exacerbate by further altering energy metabolism. Of note, a second *PFK* RNAi line (y(1) sc[\*] v(1) P{y[+7.7] v[+1.8]=TRiP.HMS01324}attP2) was tested, but was lethal when expressed in motor neurons.

Similar to the experiments with motor neurons, the over-expression of *PFK* in glial cells causes a locomotor defect, while the expression of two independent *PFK* RNAi lines has no effect on locomotor activity as determined by larval turning assays (Fig. 6 – figure supplement 1). When *PFK* is co-expressed in glial cells with TDP-43<sup>WT</sup> there is a slight but not statistically significant reduction in larval turning ( $P_{\text{value}} > 0.302$ ) while it significantly mitigates TDP-43<sup>G298S</sup> ( $P_{\text{value}} = 0.001$ , Fig. 6 – figure supplement 1). Moreover, the knockdown of *PFK* in conjunction with TDP-43<sup>WT</sup> significantly impaired locomotor function when compared to TDP-43<sup>WT</sup> expression alone ( $P_{\text{value}} < 0.001$ , Fig. 6 – figure supplement 1). *PFK* knock down did not affect TDP-43<sup>G298S</sup> expressing flies ( $P_{\text{value}} > 0.057$ , Fig. 6 – figure supplement 1). Importantly, the protective effect of *PFK* overexpression in motor neurons does not occur via reducing TDP-43 levels (Fig. 6 – figure supplement 1). These results indicate that an increase in glycolysis, in either motor neurons or glial cells, can ameliorate TDP-43 toxicity.

## **Compensatory upregulation of PFK transcript is not a consequence of sequestration in TDP-43 insoluble complexes**

Our findings of increased *PFK* mRNA levels and genetic interaction data with *PFK* support a protective compensatory mechanism (see Fig. 7 for model). This could be in part explained by the ribostasis hypothesis (Ramaswami et al., 2013) whereby *PFK* mRNA associates with TDP-43 in insoluble complexes and as a result, transcription is upregulated to compensate for the amount of mRNA sequestered and unavailable for translation. This however, does not seem to be the case, as soluble versus insoluble fractionation experiments do not support this hypothesis (Fig. 7

– figure supplement 1). Surprisingly, *PFK* mRNA appears to be more soluble in the context of TDP-43<sup>WT</sup> versus TDP-43<sup>G298S</sup>, consistent with different TDP-43 variants utilizing distinct pathomechanisms, as we have previously reported (Coyne et al., 2017; Estes et al., 2013).

## Discussion

It is widely known that ALS patients display gross metabolic dysregulation described as hypermetabolism (for a recent review, see (Joardar et al., 2017)). However, a major challenge in the field has been to understand how these clinical observations relate to metabolic changes at the cellular level. Here, we take advantage of cell type specific genetic tools available in *Drosophila* to pinpoint how specific metabolic changes in neurons and glia relate to disease progression. Using metabolic profiling we first found that the neuronal expression of TDP-43 increases the abundance of pyruvate, the end product of glycolysis. Notably, this alteration is consistent with metabolite changes in plasma from ALS patients (Lawton et al., 2012) and suggest an increase in glycolysis. Substantiating this scenario is transcriptional profiling of ALS spinal cords and patient derived iPSC motor neurons showing that just as in flies, *PFK*, the rate limiting step in glycolysis, is significantly upregulated (Fig. 2). Interestingly, metabolic profiling in flies also suggests increased glycolytic input into the pentose phosphate pathway (Supplemental file 1), which provides a mechanism for countering oxidative stress via increased NADPH production (Kruger and von Schaewen, 2003). Supporting this possibility are our findings that G6PD, the rate limiting enzyme of the pentose phosphate pathway is upregulated in fly and human ALS ventral and spinal cords, respectively (Fig. 2). Oxidative stress is a well-established ALS manifestation (Barber and Shaw, 2010) and the most recent FDA approved drug for treating ALS patients, Radicava, is aimed at countering this aspect of the disease (Cruz, 2018). Collectively, molecular and metabolic alterations identified in the fly validate in patient derived motor neurons and spinal cords, albeit the magnitude of the changes found in human ALS tissues is often more dramatic and, at some level, more comparable with mutant TDP-43 dependent phenotypes in flies. These findings highlight the predictive power of the fly model and its relevance to studying disease pathomechanisms in humans.



Using a genetically encoded glucose sensor we show that TDP-43<sup>G298S</sup> expressing motor neurons have increased capacity to import glucose (Fig. 3). This is consistent with increased glycolysis and its end product, pyruvate. It is unclear why despite finding that pyruvate is also increased in motor neurons overexpressing TDP-43<sup>WT</sup>, we could not detect higher glucose uptake than in controls, although this is consistent with PFK transcript levels trending up, yet not reaching significance in our data set (Fig. 2). A possible explanation is that while our model is based on TDP-43 expression specifically in motor neurons or glia, the metabolite profiling was performed on whole larvae and captured non-cell autonomous changes, occurring in cells other than motor neurons. Nevertheless, taken together our data show that there is a clear dysregulation of glycolysis in TDP-43 expressing *Drosophila* and patient tissue samples. Alterations in glucose metabolism may also be a feature of multiple ALS types. Indeed, pre-symptomatic SOD1 mutant mice have been shown to have high glucose levels in spinal cords; however, glucose levels gradually decrease as disease symptoms progress (Miyazaki et al., 2012). One question that remains is whether alterations in glucose metabolism are compensatory or causative.

In an effort to address this question, we first increased glucose availability in *Drosophila* by raising the dietary concentration of glucose (5-10 X higher than normal levels in standard fly food), which mitigates locomotor defects and increases lifespan in ALS flies while making wild-type larvae sluggish (Fig. 3). Interestingly, a high sugar diet only mitigates locomotor defects when TDP-43 is expressed in motor neurons or glia but not muscles, indicating that the primary metabolic defect lies in the nervous system and that muscles do not benefit from increased glucose availability (Fig. 4 and Fig. 4 – figure supplements 2 and 5). This is somewhat surprising given that muscles normally rely on glycolysis for ATP production but is also consistent with findings that in ALS, muscles switch to primarily using lipids and not glucose for energy production (Palamiuc et al., 2015).

This systemic approach, however, does not provide information on which cells specifically benefit from increased glucose availability. To answer this question, we intervened genetically by overexpressing human glucose transporters GLUT-3 or GLUT-4 in motor neurons, glia or muscles (Figs. 4, 5 and Fig. 4 – figure supplements 2 and 5). These experiments showed that both GLUT-



3 and GLUT-4 rescued locomotor dysfunction of TDP-43 expressing larvae in the nervous system, but not in muscles (Fig. 4 and Fig. 4 – figure supplements 2 and 5) confirming our findings from high sugar feedings. Furthermore, our findings that overexpression of either GLUT-3 or GLUT-4 can help mitigate specific ALS-like phenotypes in flies are consistent with recent reports that both GLUT-3 and GLUT-4 are required at synapses to regulate activity (Ashrafi et al., 2017; Ferreira et al., 2011). Together, our dietary intervention and GLUT-3/4 overexpression experiments indicate that increased glucose availability in motor neurons and glia confers protection in models of TDP-43 proteinopathy, in a cell type dependent manner.

A possible explanation for why increased glucose availability improves defects caused by TDP-43 proteinopathy is that cells are actively consuming glucose to increase glycolytic flux. A recent study using vertebrate cell lines suggests that glycolytic flux depends on four key steps. They include: 1) glucose uptake by glucose transporters, 2) hexokinase levels, 3) *PFK* levels (and associated enzymes), and 4) lactate export, but not other enzymes or steps involved in glycolysis (Tanner et al., 2018). The co-over-expression of *PFK* mitigates TDP-43 defects in flies, and is consistent with our GLUT-3 over-expression experiments (Fig. 6). Surprisingly, *PFK* transcript levels were higher in human ALS post-mortem tissues compared to controls, however protein levels in total tissue homogenates were not significantly increased despite trending upwards (data not shown). Nevertheless, our findings of increased *PFK* mRNA levels in flies and human tissues, and the genetic interaction experiments support the notion that glycolysis is increased in ALS as a compensatory mechanism (see Fig. 7 for model).

The fact that neurons would compensate deficits in cellular energetics through increasing glycolysis makes sense in the light of well-established defects in mitochondrial function. TDP-43 has been previously shown to localize to the inner mitochondrial membrane of mitochondria (Wang et al., 2016), and it has been shown to cause abnormally small mitochondria in *Drosophila* (Khalil et al., 2017). Consistent with the importance of glycolysis in neurodegeneration, there are reports of SNPs within *PFK* that are present in ALS patients but not in healthy controls (Rouillard et al., 2016; Xie et al., 2014). Our findings that glycolysis is increased as a compensatory mechanism and this confers neuroprotection is consistent with findings from a small clinical trial

showing that a high caloric high carbohydrate diet improves patient outcome (Wills et al., 2014a) and also that patients with diabetes have a later onset of disease (Kioumourtzoglou et al., 2015). While upregulation of glycolysis decreases the dependence of the organism for ATP derived from mitochondria, it is also possible that increased glycolysis is improving organismal health through a different mechanism. For example, pyruvate has been previously shown to protect mitochondria from oxidative stress (Wang et al., 2007). Future studies should focus on the link between glycolysis, oxidative stress and mitochondria in ALS.

## Materials and Methods

### *Drosophila* genetics

Standard crosses were incubated at 25°C with a 12-hour alternating dark-light cycles. (i)  $w^{1118}$  (ii)  $w^{1118}$ ; UAS-TDP43<sup>WT</sup>-YFP (iii)  $w^{1118}$ ; UAS-TDP43<sup>G29S8</sup>-YFP (iv) UAS-GLUT3 flies were crossed with the GAL4 motor neuron driver D42. GLUT3 TDP-43 recombinant flies were generated using standard genetic techniques. GLUT3 flies were described in (Besson et al., 2015).

TDP-43 was expressed in motor neurons and glia using the D42 GAL4 (Gustafson and Boulianne, 1996) and repo GAL4 (Sepp et al., 2001) drivers, respectively.  $w^{1118}$  was crossed with either the D42 or repo GAL4 drivers as a control. Endogenous TDP-43 was knocked down via RNAi using  $y[1] \ v[1]; P\{y[+t7.7] \ v[+t1.8]=TRiP.HMS01932\}attP40$  and  $y[1] \ v[1]; P\{y[+t7.7] \ v[+t1.8]=TRiP.HM05194\}attP2$ .

To manipulate PFK, we used  $w^{1118}; P\{w[+mC]=UAS-Pfk.T\}3$  for over expression, and  $y^1 \ sc^* \ v^1; P\{y[+t7.7] \ v[+t1.8]=TRiP.HMS01324\}attP2$  or  $y^1 \ sc^* \ v^1; P\{y[+t7.7] \ v[+t1.8]=TRiP.GL00298\}-attP2$  (Line 2, viable only in glial expressing flies) for PFK knock down. *attP2* was used as a genetic background control for PFK RNAi knock-down experiments. All lines were obtained from the Bloomington Stock Center.

PFK RNAi efficiency was assayed by crossing PFK RNAi to D42 GAL4. Ventral nerve cords were dissected and analyzed via qPCR (see below for primers). A Welch's t-test was used to identify significance.

## **Fly food supplementation**

Standard yeast/cornmeal/molasses food was heated and then allowed to cool to 55-60°C. For high sugar supplementation, additional glucose was added to reach a final concentration of 357g/L (10X compared to regular food). Supplemented food was dispensed into vials and allowed to cool.

## **Locomotor assays**

Larval turning assays were performed as previously described (Estes et al., 2011; Estes et al., 2013). Briefly, larvae are placed on a petri dish filled with solidified agar (2.5%) and grape juice. Third instar larvae are transferred from a vial onto the agar/juice surface and are allowed to acclimate. Using a clean paintbrush, larvae are turned ventral side up. The time it takes for larvae to turn themselves ventral side down and make a forward motion is recorded. Larval turning data were analyzed using Kruskal-Wallis multiple comparison tests (GraphPad Prism v8). Negative geotaxis assays on adult flies were performed by using TDP-43 expressing flies with a milder phenotype/lethality. TDP-43<sup>WT</sup> and TDP-43<sup>G298S</sup> flies were previously described in (Khalil et al., 2017). Briefly, TDP-43 and GLUT-3 were expressed in neurons with the pan neuronal driver, elav GAL4. Female flies of 11-day old were anesthetized with CO<sub>2</sub> and placed in a plastic column (diameter 1.3 cm) with a mark at 22 cm. After 20 min recovery, flies were gently tapped to the bottom of the column. Then the percentages of flies reaching the 22 cm mark or remaining at the bottom were counted after 60 sec. The test was repeated 3 times and results were averaged. The data are the mean of at least 6 trials and are expressed as mean ± SEM. Statistical comparisons were performed using one-way ANOVA followed by Tukey's multiple-comparison test.

## **Metabolite analysis**

Metabolomic analysis was conducted by Metabolon, Inc as previously described (Joardar et al., 2014; Manzo et al., 2018). Briefly, 50–60 wandering third instar larvae (~50–60 mg) per sample were collected and flash-frozen in liquid nitrogen. A total of 5 replicates per genotype were collected. Samples were analyzed by ultrahigh performance liquid chromatography/mass

spectrometry (UHPLC/MS), or by gas chromatography/mass spectrometry (GC/MS). One-way ANOVA was used to identify biochemicals that differed significantly between experimental groups.

### **Pyruvate measurements**

Pyruvate was measured using the Pyruvate Assay Kit (Abcam-ab65342) as per manufacturer's instructions. In brief, 20 3<sup>rd</sup> instar larvae per genotype were analyzed in three biological replicates. Standard curve was generated kit provided reagents. Results are shown (Fig. 1 – figure supplement 1) in nmoles/microliter.

### **RNA isolation, cDNA preparation and qPCR**

cDNA protocol has been previously described (Manzo et al., 2018). Briefly, 5 ventral nerve cords (VNCs) were isolated from third instar larvae per genotype using HL-3 saline buffer (70 mM NaCl, 5 mM KCl, 22 mM MgCl<sub>2</sub>, 10 mM NaHCO<sub>3</sub>, 5 mM trehalose, 115 mM sucrose, 5 mM HEPES, pH 7.3). RNA was extracted using the RNeasy RNA Extraction Kit (Qiagen) and stored at -80°C. Genomic DNA (gDNA) was cleared using a DNase I (Thermo Fisher Scientific) digestion protocol. Following gDNA clearing, reverse transcription was performed using the Maxima First Strand cDNA Synthesis Kit for RT-qPCR (Thermo Fisher Scientific). The quality of the cDNA was tested using GPDH primers (see below for sequence) and GoTaq endpoint polymerase chain reaction (PCR) protocol (Promega). Quantitative PCR was performed using a SYBR Green protocol (Applied Biosystems) and primers designed to span exon-exon junctions. Each reaction was conducted in 3-6 biological replicates with three technical replicates each.  $\Delta\Delta CT$  values are normalized to GPDH (Pfaffl, 2001). The Kruskal-Wallis test was used to assess statistical significance in GraphPad Prism v8. Protocols for human tissue RNA isolation and cDNA preparation have been previously described (Bakkar et al., 2018). RT-PCR was performed using TaqMan Gene Expression Assays following the TaqMan Fast Advanced Master Mix protocol (Applied Biosystems) on the QuantStudio 6 Flex instrument (Applied Biosystems).

### **Primer sequences and Taqman probes**

422 *Drosophila* Phosphofructokinase (PFK): Forward primer - TGGACGAGCTGGTCAAGAAC;  
 423 Reverse primer - CCACAAGAGCTAAATAGCCG  
 424 *Drosophila* G6PD (Zw): Forward primer - AAGCGCCGCAACTCTTTG; Reverse primer -  
 425 AGGGCGGTGTGATCTTCC  
 426 *Drosophila* GPDH: Forward primer - CCGCAGTGCTTGTGTTTGCT; Reverse primer -  
 427 TATGGCCGAACCCCAGTTG  
 428 Human Phosphofructokinase P (PFKP): Assay ID Hs00242993\_m1  
 429 Human Phosphofructokinase M (PFKM): Assay ID Hs00175997\_m1  
 430 Human G6PD: Assay ID Hs00166169\_m1  
 431 Human GAPDH: Assay ID Hs99999905\_m1

432

### 433 **Glucose sensor**

434 Third instar larval brains were dissected in HL3-buffer (70 mM NaCl, 5 mM KCl, 20 mM MgCl<sub>2</sub>,  
 435 10 mM NaHCO<sub>3</sub>, 115 mM sucrose, 5 mM trehalose, 5 mM HEPES; pH 7.1). Of note, the glucose  
 436 sensor is not sensitive to trehalose (Volkenhoff et al., 2018). Larvae were pinned down on a  
 437 Sylgard plate using insect pins and cleaned so that the ventral nerve cord is clearly visible. A 40x  
 438 water immersion lens was used to image larvae individually. For glucose stimulation, HL3-buffer  
 439 was removed and replaced with 5mM glucose supplemented HL3 (70 mM NaCl, 5 mM KCl, 20  
 440 mM MgCl<sub>2</sub>, 10 mM NaHCO<sub>3</sub>, 115 mM sucrose, 5 mM glucose, 5mM HEPES, pH 7.1).

441 Fluorescent images were acquired using a Zeiss LSM880 NLO upright  
 442 multiphoton/confocal microscope. CFP was excited using a 405-nm laser, and images were  
 443 acquired in both the CFP (CFP 465–499 nm) and the FRET (535–695 nm) detection channels.

444 Data was analyzed using ImageJ with a drift correction plugin turboreg (Thevenaz et al.,  
 445 1998). Regions of interest (ROIs) were manually selected and the mean grey value of each ROI  
 446 was extracted. The mean grey values for the FRET and CFP channels was taken to calculate the  
 447 FRET ratio (F/C), which corresponds to the intracellular glucose concentration.

448 Each ROI was imaged every 10 seconds for 10 minutes (baseline) and then for another  
 449 10 minutes under high glucose HL-3 (stim; see Fig. 3 – figure supplement 1 for representative

examples). Each FRET ratio was normalized to the mean baseline value for each genotype. For baseline vs stim comparisons (Fig. 3B), the normalized FRET ratio of each ROI was taken from minutes 5-10 and minutes 15-20.

## **Western blots**

TDP-43 was detected via its YFP tag using either the Clontech/Takara Living Colors GFP monoclonal antibody (6326375) at 1:1,000 (for Fig. 4 – figure supplement 4) or the ThermoFisher polyclonal antibody (A-11122) at 1:1,000 (for Fig. 6 – figure supplement 1). For normalization we used either the Cell Signaling polyclonal rabbit anti  $\beta$ -Actin antibody (4967) at a 1:1,000 dilution or the Millipore Sigma monoclonal antibody against beta tubulin (Mab3408) at 1:1,000. 5% milk was used as blocking agent for all westerns.

## **FM1-43 experiments**

Larvae are dissected in HL-3 buffer on a sylgard dish as previously described. FM1-43 dye uptake assays were conducted using 4  $\mu$ M FM1-43FX, 90 mM KCl, and 2 mM  $\text{Ca}^{2+}$  for stimulation. Methods adapted from (Kuromi and Kidokoro, 2005; Verstreken et al., 2008). To determine dye uptake signal, the background-corrected fluorescence for every synaptic bouton was calculated by subtracting the mean background fluorescence of cell-free regions equal in size to the synaptic bouton.

## **Bouton counts**

Larval NMJs were dissected and fixed with 3.5% paraformaldehyde in PBS (pH 7.2: 130 mM NaCl, 5 mM  $\text{Na}_2\text{HPO}_4$ , 5mM  $\text{NaH}_2\text{PO}_4$ ) for 30 minutes. Antibody dilutions are as follows: 1:300 mouse anti-DCSP2 (DSHB), 1:500 anti-mouse Alexa Fluor 568 (Invitrogen), 1:200 Anti-HRP-CY5 conjugate (Invitrogen), and 1:40 Phalloidin-488 (Invitrogen). Blocking solution contained 2% BSA and 5% Normal goat serum. Methods have been previously described in (Coyne et al., 2014).

Larval muscles 6 and 7, segment A3, were imaged using an LSM 880 confocal microscope (Zeiss). NIH ImageJ was used to count bouton numbers and measure muscle area. Bouton count was normalized to muscle area to account for size variation.

## **iPSC methods**

Control iPSC and TDP-43 iPSC cells were differentiated to motor neurons as previously described (Donnelly et al., 2013; Zhang et al., 2015).

## **Cellular Fractionations**

To generate cellular fractions, 25 3<sup>rd</sup> instar wandering larvae were flash frozen, followed by homogenization in Trizol<sup>TM</sup> reagent using the Bullet Blender<sup>TM</sup> Bead Lysis Kit Green in conjunction with a Bullet Blender<sup>TM</sup> Blue 24. Homogenates were then centrifuged at 2,000 x g for 3 minutes. The supernatant was separated from both the fat layer and the beads then it was further centrifuged at 25,000 g for 30 minutes. The resulting supernatant is the soluble fraction and the insoluble fraction is generated by resuspending the pellet in urea buffer (30 mM Tris, 7 M Urea, 2 M Thiourea, 4% CHAPS, 1X Protease Inhibitor Cocktail (Roche), 0.5 mM PMSF, 40 units/ $\mu$ l RNAsin plus, pH 8.5). RNA was isolated from inputs and the cellular fractions utilizing the manufactured described protocol for Trizol<sup>TM</sup> reagent. cDNA was then generated utilizing Thermoscientific<sup>TM</sup> Maxima First Strand cDNA Synthesis Kit for RT-qPCR. RT-qPCR was conducted on the StepOnePlus<sup>TM</sup> RT-qPCR machine utilizing Sybr reagents.

## **Statistics**

All statistical analyses for locomotor assays or qPCR comprising three or more data sets were conducted using Kruskal-Wallis with uncorrected Dunn's test in Prism v8.0 (GraphPad). When only two data sets were compared, either Welch's test or Wilcoxon signed-rank test were used. Biological replicates for qPCR and metabolomics are defined as independent sample collections per genotype, from independent genetic crosses. All qPCR experiments included three technical



replicates per biological replicate. Outliers were removed using ROUT method (Q=1%) in Prism v8.0.

# **References cited:**

- Ashrafi, G., Wu, Z., Farrell, R.J., and Ryan, T.A. (2017). GLUT4 Mobilization Supports Energetic Demands of Active Synapses. *Neuron* 93, 606-615 e603.
- Bakkar, N., Kovalik, T., Lorenzini, I., Spangler, S., Lacoste, A., Sponaugle, K., Ferrante, P., Argentinis, E., Sattler, R., and Bowser, R. (2018). Artificial intelligence in neurodegenerative disease research: use of IBM Watson to identify additional RNA-binding proteins altered in amyotrophic lateral sclerosis. *Acta Neuropathol* 135, 227-247.
- Barber, S.C., and Shaw, P.J. (2010). Oxidative stress in ALS: key role in motor neuron injury and therapeutic target. *Free Radic Biol Med* 48, 629-641.
- Besson, M.T., Alegria, K., Garrido-Gerter, P., Barros, L.F., and Lievens, J.C. (2015). Enhanced neuronal glucose transporter expression reveals metabolic choice in a HD *Drosophila* model. *PLoS One* 10, e0118765.
- Browne, S.E., Yang, L., DiMauro, J.P., Fuller, S.W., Licata, S.C., and Beal, M.F. (2006). Bioenergetic abnormalities in discrete cerebral motor pathways presage spinal cord pathology in the G93A SOD1 mouse model of ALS. *Neurobiol Dis* 22, 599-610.
- Coyne, A.N., Lorenzini, I., Chou, C.C., Torvund, M., Rogers, R.S., Starr, A., Zaepfel, B.L., Levy, J., Johannesmeyer, J., Schwartz, J.C., *et al.* (2017). Post-transcriptional Inhibition of Hsc70-4/HSPA8 Expression Leads to Synaptic Vesicle Cycling Defects in Multiple Models of ALS. *Cell Rep* 21, 110-125.
- Coyne, A.N., Siddegowda, B.B., Estes, P.S., Johannesmeyer, J., Kovalik, T., Daniel, S.G., Pearson, A., Bowser, R., and Zarnescu, D.C. (2014). Futsch/MAP1B mRNA Is a Translational Target of TDP-43 and Is Neuroprotective in a *Drosophila* Model of Amyotrophic Lateral Sclerosis. *J Neurosci* 34, 15962-15974.
- Cruz, M.P. (2018). Edaravone (Radicava): A Novel Neuroprotective Agent for the Treatment of Amyotrophic Lateral Sclerosis. *P T* 43, 25-28.



531 Donnelly, C.J., Zhang, P.W., Pham, J.T., Haeusler, A.R., Mistry, N.A., Vidensky, S., Daley, E.L.,  
532 Poth, E.M., Hoover, B., Fines, D.M., *et al.* (2013). RNA toxicity from the ALS/FTD C9ORF72  
533 expansion is mitigated by antisense intervention. *Neuron* 80, 415-428.  
534 Dupuis, L., Pradat, P.F., Ludolph, A.C., and Loeffler, J.P. (2011). Energy metabolism in  
535 amyotrophic lateral sclerosis. *Lancet Neurol* 10, 75-82.  
536 Estes, P.S., Boehringer, A., Zwick, R., Tang, J.E., Grigsby, B., and Zarnescu, D.C. (2011). Wild-  
537 type and A315T mutant TDP-43 exert differential neurotoxicity in a *Drosophila* model of ALS.  
538 *Human molecular genetics* 20, 2308-2321.  
539 Estes, P.S., Daniel, S.G., McCallum, A.P., Boehringer, A.V., Sukhina, A.S., Zwick, R.A., and  
540 Zarnescu, D.C. (2013). Motor neurons and glia exhibit specific individualized responses to TDP-  
541 43 expression in a *Drosophila* model of amyotrophic lateral sclerosis. *Disease models &*  
542 *mechanisms* 6, 721-733.  
543 Fehr, M., Lalonde, S., Lager, I., Wolff, M.W., and Frommer, W.B. (2003). In vivo imaging of the  
544 dynamics of glucose uptake in the cytosol of COS-7 cells by fluorescent nanosensors. *J Biol*  
545 *Chem* 278, 19127-19133.  
546 Ferreira, J.M., Burnett, A.L., and Rameau, G.A. (2011). Activity-dependent regulation of surface  
547 glucose transporter-3. *J Neurosci* 31, 1991-1999.  
548 Gustafson, K., and Boulianne, G.L. (1996). Distinct expression patterns detected within  
549 individual tissues by the GAL4 enhancer trap technique. *Genome* 39, 174-182.  
550 Hardiman, O., Al-Chalabi, A., Chio, A., Corr, E.M., Logroscino, G., Robberecht, W., Shaw, P.J.,  
551 Simmons, Z., and van den Berg, L.H. (2017). Amyotrophic lateral sclerosis. *Nat Rev Dis Primers*  
552 3, 17071.  
553 Joardar, A., Manzo, E., and Zarnescu, D.C. (2017). Metabolic Dysregulation in Amyotrophic  
554 Lateral Sclerosis: Challenges and Opportunities. *Curr Genet Med Rep* 5, 108-114.  
555 Joardar, A., Menzl, J., Podolsky, T.C., Manzo, E., Estes, P.S., Ashford, S., and Zarnescu, D.C.  
556 (2014). PPAR gamma activation is neuroprotective in a *Drosophila* model of ALS based on  
557 TDP-43. *Hum Mol Genet*.

558 Khalil, B., Cabirol-Pol, M.J., Miguel, L., Whitworth, A.J., Lecourtois, M., and Lievens, J.C.  
559 (2017). Enhancing Mitofusin/Marf ameliorates neuromuscular dysfunction in *Drosophila* models  
560 of TDP-43 proteinopathies. *Neurobiol Aging* 54, 71-83.

561 Kioumourtoglou, M.A., Rotem, R.S., Seals, R.M., Gredal, O., Hansen, J., and Weisskopf, M.G.  
562 (2015). Diabetes Mellitus, Obesity, and Diagnosis of Amyotrophic Lateral Sclerosis: A  
563 Population-Based Study. *JAMA Neurol* 72, 905-911.

564 Kruger, N.J., and von Schaewen, A. (2003). The oxidative pentose phosphate pathway:  
565 structure and organisation. *Curr Opin Plant Biol* 6, 236-246.

566 Kuromi, H., and Kidokoro, Y. (2005). Exocytosis and endocytosis of synaptic vesicles and  
567 functional roles of vesicle pools: lessons from the *Drosophila* neuromuscular junction.  
568 *Neuroscientist* 11, 138-147.

569 Lawton, K.A., Cudkowicz, M.E., Brown, M.V., Alexander, D., Caffrey, R., Wulff, J.E., Bowser, R.,  
570 Lawson, R., Jaffa, M., Milburn, M.V., *et al.* (2012). Biochemical alterations associated with ALS.  
571 *Amyotrophic lateral sclerosis : official publication of the World Federation of Neurology*  
572 *Research Group on Motor Neuron Diseases* 13, 110-118.

573 Ling, S.C., Polymenidou, M., and Cleveland, D.W. (2013). Converging mechanisms in ALS and  
574 FTD: disrupted RNA and protein homeostasis. *Neuron* 79, 416-438.

575 Ludolph, A.C., Langen, K.J., Regard, M., Herzog, H., Kemper, B., Kuwert, T., Bottger, I.G., and  
576 Feinendegen, L. (1992). Frontal lobe function in amyotrophic lateral sclerosis: a  
577 neuropsychologic and positron emission tomography study. *Acta Neurol Scand* 85, 81-89.

578 Manzo, E., O'Conner, A.G., Barrows, J.M., Shreiner, D.D., Birchak, G.J., and Zarnescu, D.C.  
579 (2018). Medium-Chain Fatty Acids, Beta-Hydroxybutyric Acid and Genetic Modulation of the  
580 Carnitine Shuttle Are Protective in a *Drosophila* Model of ALS Based on TDP-43. *Front Mol*  
581 *Neurosci* 11, 182.

582 Mergenthaler, P., Lindauer, U., Dienel, G.A., and Meisel, A. (2013). Sugar for the brain: the role  
583 of glucose in physiological and pathological brain function. *Trends Neurosci* 36, 587-597.

584 Miyazaki, K., Masamoto, K., Morimoto, N., Kurata, T., Mimoto, T., Obata, T., Kanno, I., and Abe,  
585 K. (2012). Early and progressive impairment of spinal blood flow-glucose metabolism coupling  
586 in motor neuron degeneration of ALS model mice. *J Cereb Blood Flow Metab* 32, 456-467.

587 Musselman, L.P., Fink, J.L., Narzinski, K., Ramachandran, P.V., Hathiramani, S.S., Cagan,  
588 R.L., and Baranski, T.J. (2011). A high-sugar diet produces obesity and insulin resistance in  
589 wild-type *Drosophila*. *Dis Model Mech* 4, 842-849.

590 Na, J., Musselman, L.P., Pendse, J., Baranski, T.J., Bodmer, R., Ocorr, K., and Cagan, R.  
591 (2013). A *Drosophila* model of high sugar diet-induced cardiomyopathy. *PLoS Genet* 9,  
592 e1003175.

593 Neumann, M., Sampathu, D.M., Kwong, L.K., Truax, A.C., Micsenyi, M.C., Chou, T.T., Bruce, J.,  
594 Schuck, T., Grossman, M., Clark, C.M., *et al.* (2006). Ubiquitinated TDP-43 in frontotemporal  
595 lobar degeneration and amyotrophic lateral sclerosis. *Science* 314, 130-133.

596 Palamiuc, L., Schlagowski, A., Ngo, S.T., Vernay, A., Dirrig-Grosch, S., Henriques, A., Boutilier,  
597 A.L., Zoll, J., Echaniz-Laguna, A., Loeffler, J.P., *et al.* (2015). A metabolic switch toward lipid  
598 use in glycolytic muscle is an early pathologic event in a mouse model of amyotrophic lateral  
599 sclerosis. *EMBO Mol Med* 7, 526-546.

600 Pfaffl, M.W. (2001). A new mathematical model for relative quantification in real-time RT-PCR.  
601 *Nucleic acids research* 29, e45.

602 Ramaswami, M., Taylor, J.P., and Parker, R. (2013). Altered ribostasis: RNA-protein granules in  
603 degenerative disorders. *Cell* 154, 727-736.

604 Rouillard, A.D., Gundersen, G.W., Fernandez, N.F., Wang, Z., Monteiro, C.D., McDermott,  
605 M.G., and Ma'ayan, A. (2016). The harmonizome: a collection of processed datasets gathered  
606 to serve and mine knowledge about genes and proteins. *Database (Oxford)* 2016.

607 Sepp, K.J., Schulte, J., and Auld, V.J. (2001). Peripheral glia direct axon guidance across the  
608 CNS/PNS transition zone. *Dev Biol* 238, 47-63.

609 Takanaga, H., Chaudhuri, B., and Frommer, W.B. (2008). GLUT1 and GLUT9 as major  
610 contributors to glucose influx in HepG2 cells identified by a high sensitivity intramolecular FRET  
611 glucose sensor. *Biochim Biophys Acta* 1778, 1091-1099.

612 Tanner, L.B., Goglia, A.G., Wei, M.H., Sehgal, T., Parsons, L.R., Park, J.O., White, E.,  
613 Toettcher, J.E., and Rabinowitz, J.D. (2018). Four Key Steps Control Glycolytic Flux in  
614 Mammalian Cells. *Cell Syst* 7, 49-62 e48.

615 Tauffenberger, A., Vaccaro, A., Aulas, A., Vande Velde, C., and Parker, J.A. (2012). Glucose  
616 delays age-dependent proteotoxicity. *Aging Cell*.

617 Thevenaz, P., Ruttimann, U.E., and Unser, M. (1998). A pyramid approach to subpixel  
618 registration based on intensity. *IEEE Trans Image Process* 7, 27-41.

619 Verstreken, P., Ohyama, T., and Bellen, H.J. (2008). FM 1-43 labeling of synaptic vesicle pools  
620 at the *Drosophila* neuromuscular junction. *Methods Mol Biol* 440, 349-369.

621 Volkenhoff, A., Hirrlinger, J., Kappel, J.M., Klambt, C., and Schirmeier, S. (2018). Live imaging  
622 using a FRET glucose sensor reveals glucose delivery to all cell types in the *Drosophila* brain. *J*  
623 *Insect Physiol* 106, 55-64.

624 Wang, W., Wang, L., Lu, J., Siedlak, S.L., Fujioka, H., Liang, J., Jiang, S., Ma, X., Jiang, Z., da  
625 Rocha, E.L., *et al.* (2016). The inhibition of TDP-43 mitochondrial localization blocks its neuronal  
626 toxicity. *Nat Med* 22, 869-878.

627 Wang, X., Perez, E., Liu, R., Yan, L.J., Mallet, R.T., and Yang, S.H. (2007). Pyruvate protects  
628 mitochondria from oxidative stress in human neuroblastoma SK-N-SH cells. *Brain Res* 1132, 1-  
629 9.

630 Wills, A.M., Hubbard, J., Macklin, E.A., Glass, J., Tandan, R., Simpson, E.P., Brooks, B.,  
631 Gelinas, D., Mitsumoto, H., Mozaffar, T., *et al.* (2014a). Hypercaloric enteral nutrition in patients  
632 with amyotrophic lateral sclerosis: a randomised, double-blind, placebo-controlled phase 2 trial.  
633 *Lancet* 383, 2065-2072.

634 Wills, A.M., Hubbard, J., Macklin, E.A., Glass, J., Tandan, R., Simpson, E.P., Brooks, B.,  
635 Gelinas, D., Mitsumoto, H., Mozaffar, T., *et al.* (2014b). Hypercaloric enteral nutrition in patients  
636 with amyotrophic lateral sclerosis: a randomised, double-blind, placebo-controlled phase 2 trial.  
637 *Lancet* 383, 2065-2072.

638 Xie, T., Deng, L., Mei, P., Zhou, Y., Wang, B., Zhang, J., Lin, J., Wei, Y., Zhang, X., and Xu, R.  
639 (2014). Genome-wide association study combining pathway analysis for typical sporadic

amyotrophic lateral sclerosis in Chinese Han populations. *Neurobiol Aging* 35, 1778 e1779-1778 e1723.

Zhang, P.W., Haidet-Phillips, A.M., Pham, J.T., Lee, Y., Huo, Y., Tienari, P.J., Maragakis, N.J., Sattler, R., and Rothstein, J.D. (2015). Generation of GFAP::GFP astrocyte reporter lines from human adult fibroblast-derived iPS cells using zinc-finger nuclease technology. *Glia*.

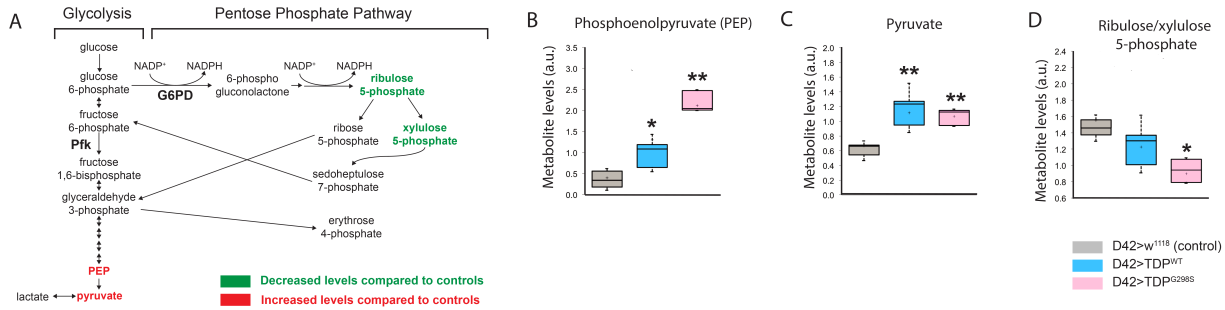

**Figure 1. Glycolysis and pentose phosphate pathways are altered by TDP-43 expression in motor neurons. (A)** Metabolite changes in glycolysis for whole larvae expressing TDP-43<sup>WT</sup> or TDP-43<sup>G298S</sup> were analyzed using mass spectrometry (see Materials and Methods). Green and red font represent metabolites that are significantly changed compared to controls (w<sup>1118</sup>), as indicated. PEP and pyruvate were upregulated in both TDP-43<sup>WT</sup> and TDP-43<sup>G298S</sup> expressing flies and is denoted by red asterisks. Changes in the pentose phosphate pathway metabolites are specific to larvae expressing TDP-43<sup>G298S</sup>. **(B, C, D)** Significant changes in select metabolites shown as box and whisker plots. Whiskers represent maximum and minimum values. Box edges represent upper and lower quartiles. Median values are denoted by horizontal lines within each box. One-way ANOVA was used to identify metabolites that differed significantly between experimental groups (N=5).

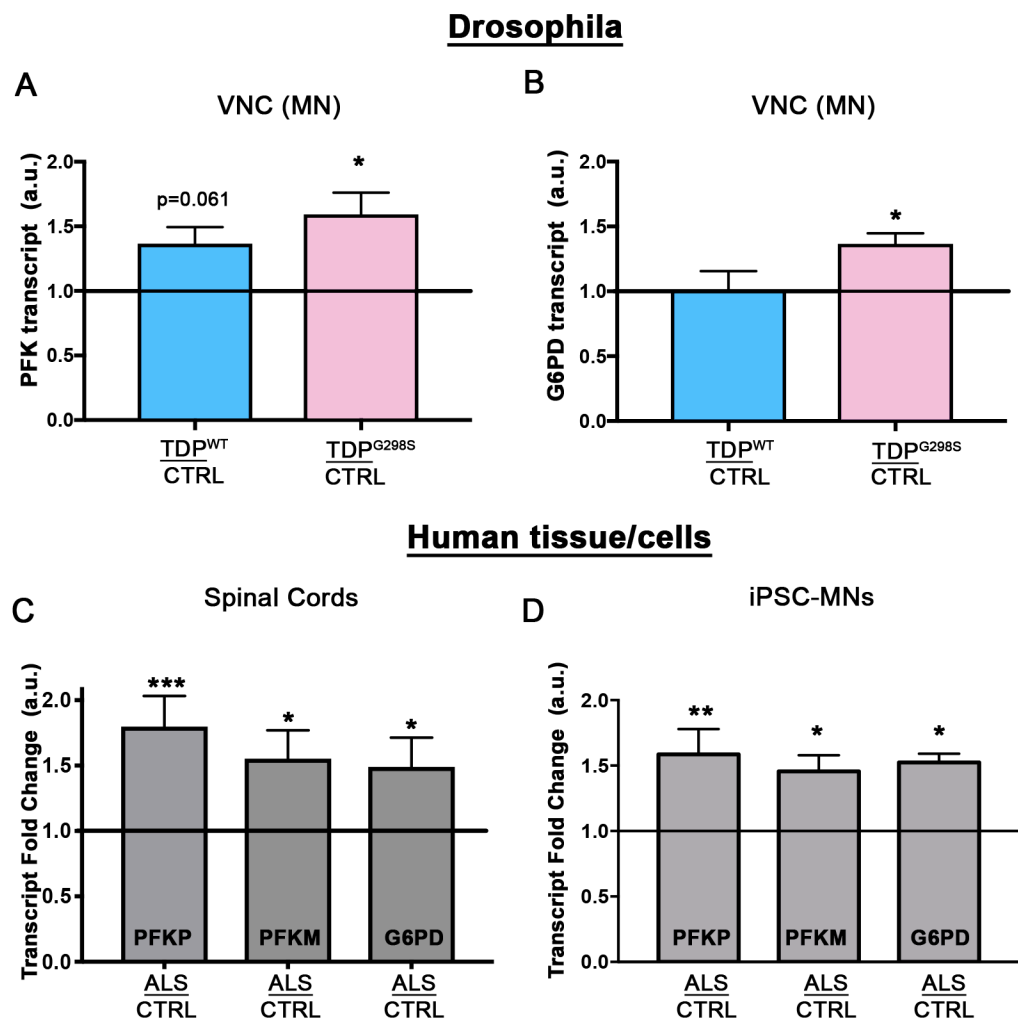

**Figure 2. Glycolytic enzymes are transcriptionally upregulated.** qPCR profiling of PFK (A; N=5) and G6PD (B; N=5) from ventral nerve cords of *Drosophila*. Human PFKP, PFKM, or G6PD mRNA levels were profiled in either spinal cords (C; N=8 control and 9 ALS cases) or human iPSCs (D; N=2 differentiations). Kruskal-Wallis test was used to identify significance.

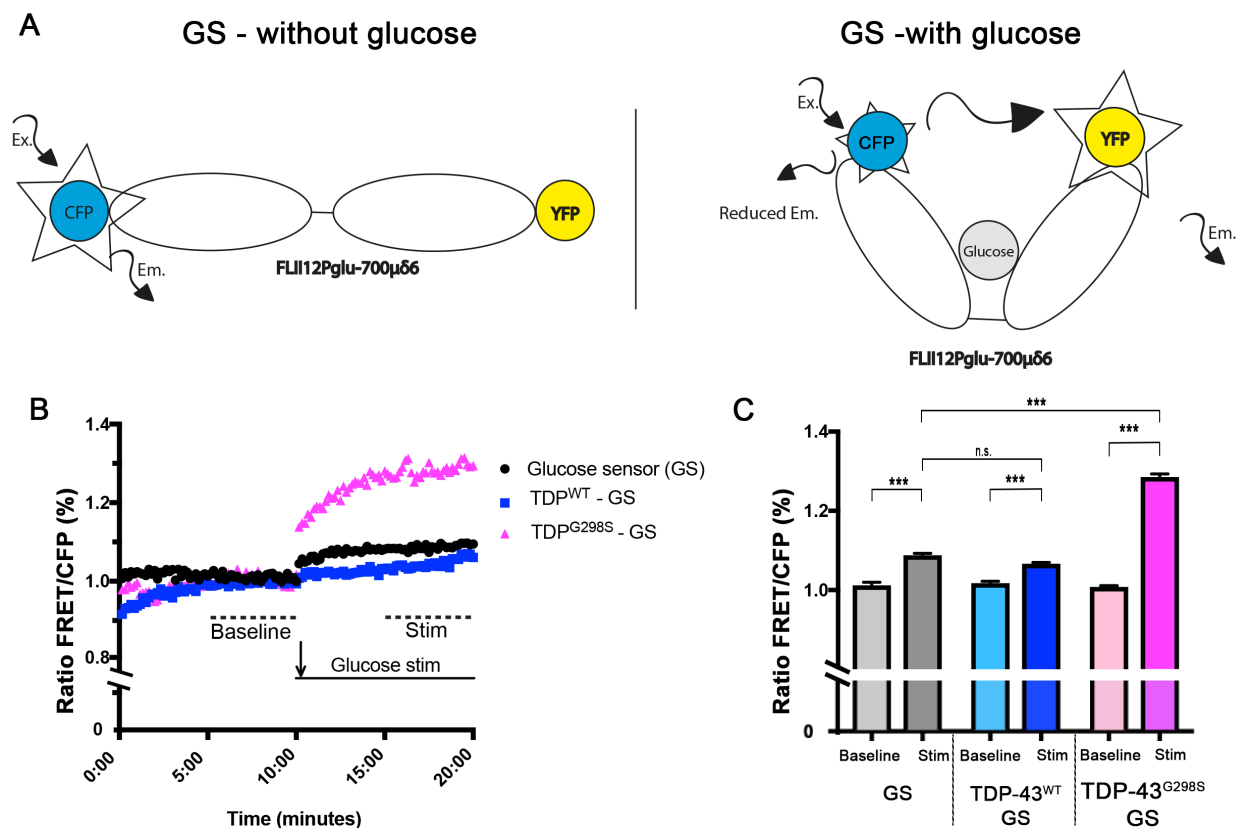

**Figure 3. TDP expressing neurons have altered capacity to import glucose.** FRET based glucose sensor described in (Volkenhoff et al., 2018) was used to measure the glucose import capacity. Glucose sensor schematic described in (A). Ex – Excitation; Em – Emission. (B, C)

TDP-43 expressing neurons and controls were imaged to detect CFP and FRET signal. 12-14 neurons were imaged every 10 seconds for 20 minutes. Values shown are the mean of 12-14 individual cells (ROI) from two ventral nerve cords (B). Mean values for 5-10 minutes and 15-20 minutes time intervals were used to calculate the “baseline” and “stimulated” (“Stim”) values respectively (C). Kruskal-Wallis test was used to calculate significance.

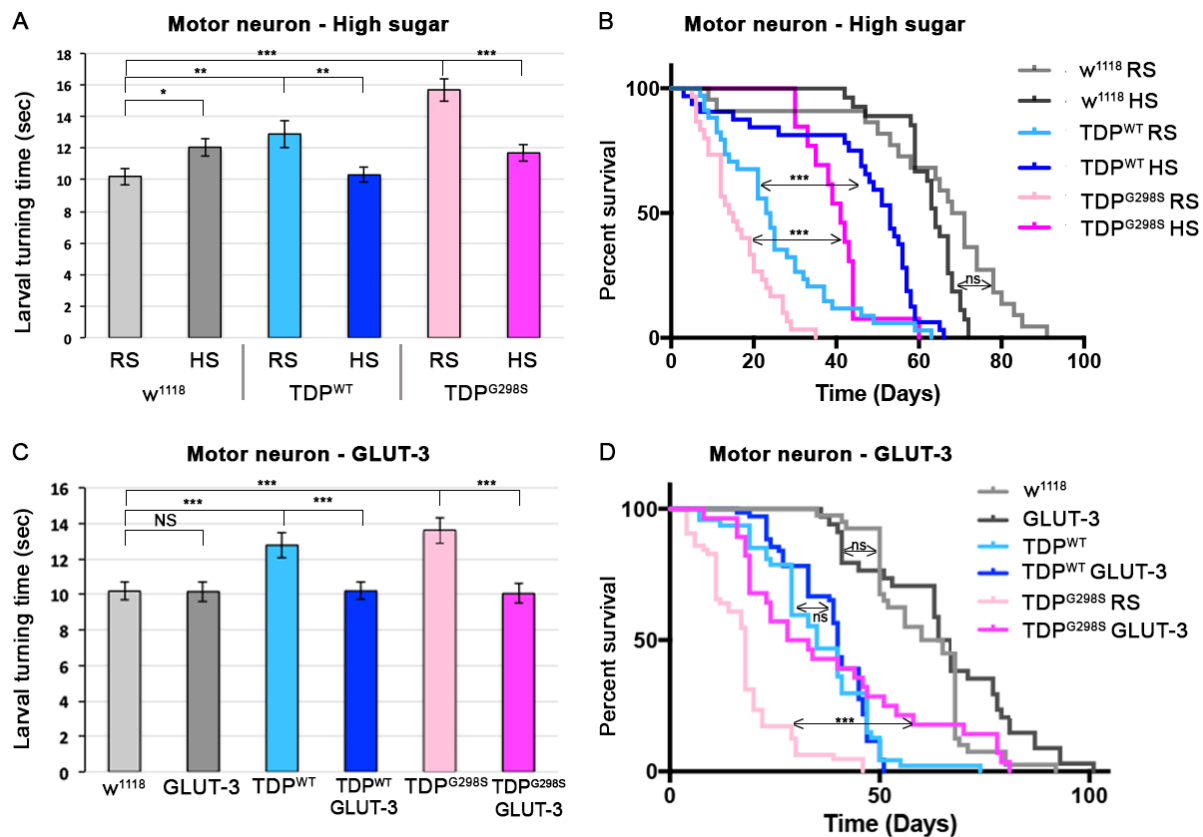

**Figure 4. A high glucose diet rescues neuronal TDP-43 toxicity in flies.** TDP-43<sup>WT</sup> or ALS associated TDP-43<sup>G298S</sup> were expressed in MNs (using GAL4-UAS). (A, B) Larval turning and lifespan assays for *Drosophila* fed a cornmeal based food containing either regular concentration of sugar (RS) or a high sugar diet (HS:10x the standard amount of sugar). (C, D) Larval turning and lifespan assays for *Drosophila* expressing GLUT-3 on its own or with TDP-43, as indicated. At least 30 larvae were tested in larval turning assays and on average 20 adults were assayed for survival. Kruskal-Wallis test and Log-rank (Mantel-Cox) test was used to determine statistical significance for larval turning and survival curve respectively. \* -  $p < .05$ , \*\* -  $p < 0.01$ , \*\*\* -  $p < 0.001$ .



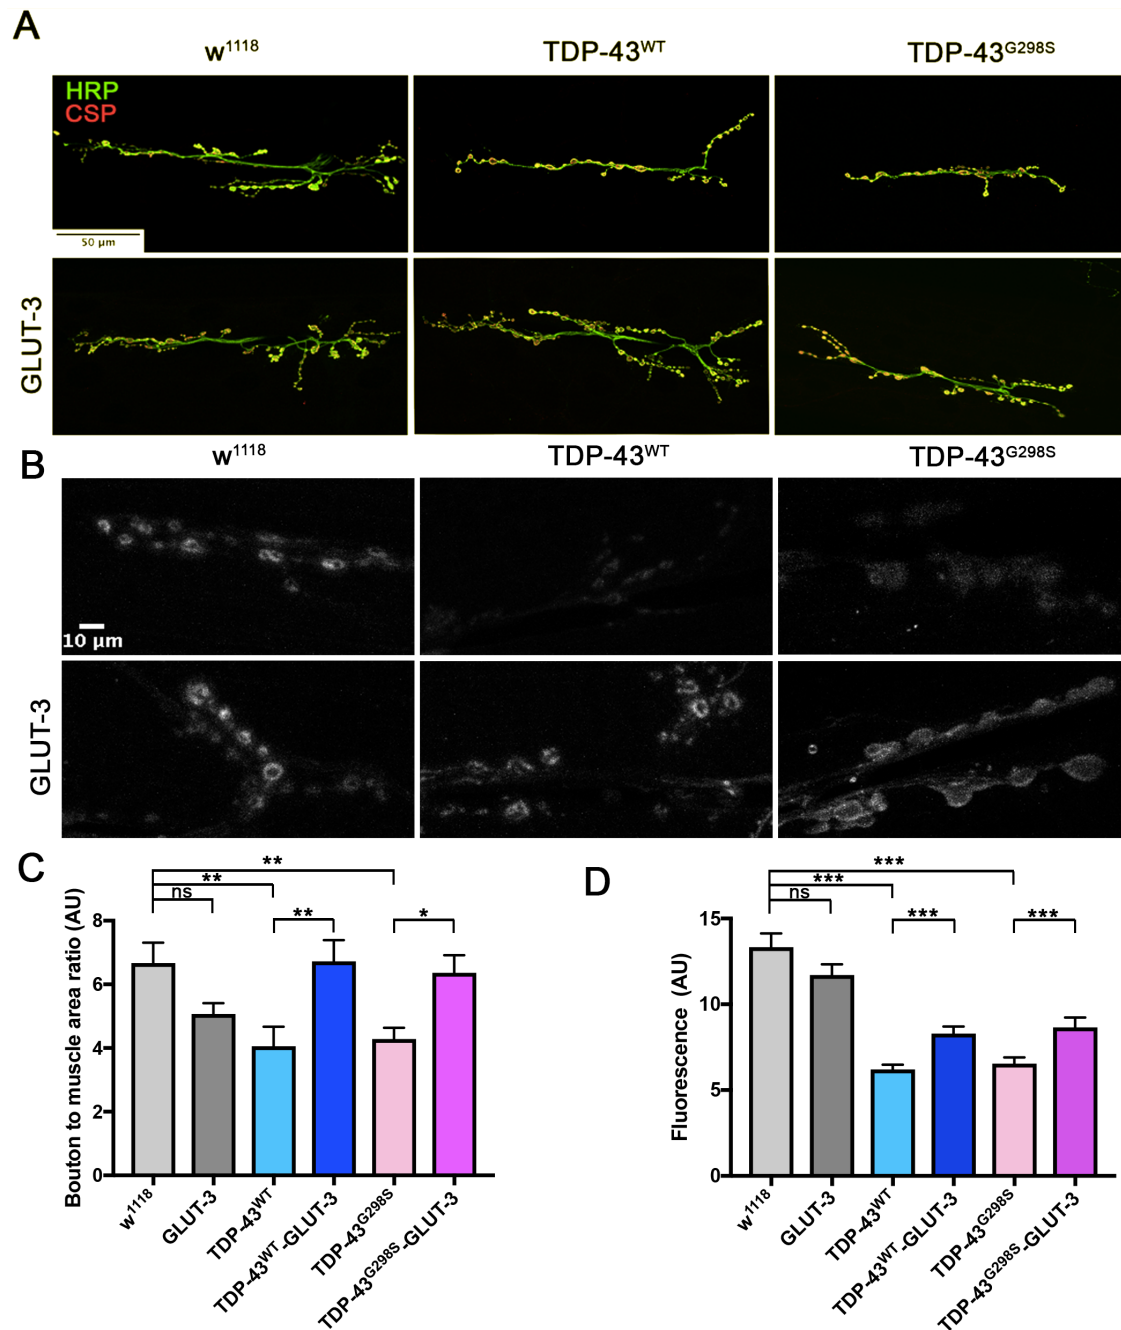

**Figure 5. TDP-43 dependent defects at the NMJ are rescued by GLUT-3.** Third instar larvae NMJ from segment A3, muscle 6/7 were immunostained for CSP and HRP (A) or analyzed for their ability to endocytose FM1-43 dye upon stimulation with 90 mM KCl (B). (A, C) Neuronal TDP-43 expression in *Drosophila* neurons reduces the number of boutons (labeled with CSP and HRP A, C) and reduces FM1-43 dye uptake (B, D). These morphological (A, C) and functional (B, D) deficits are rescued by co-expression of GLUT-3. N = 7-10 larvae. Kruskal-Wallis test was used to identify significance.

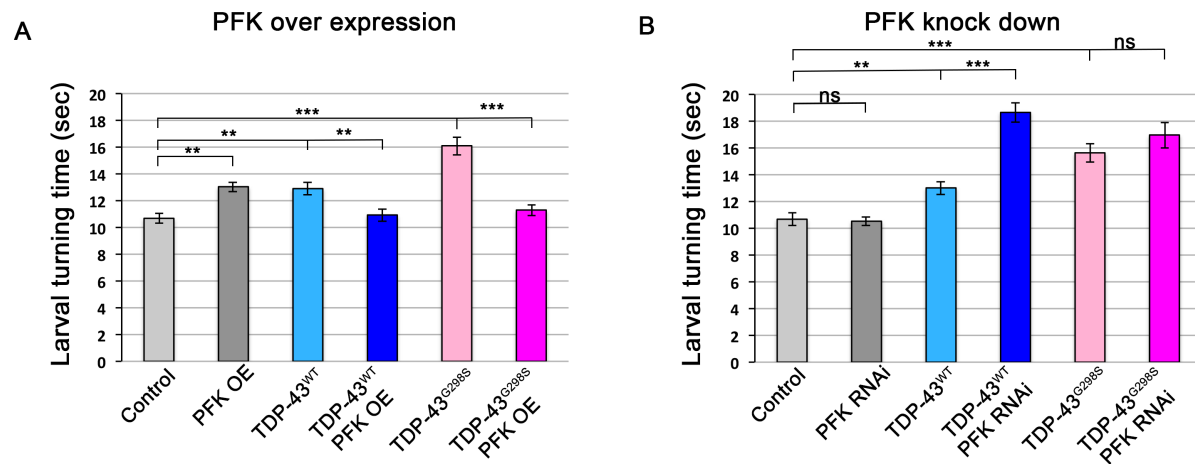

**Figure 6. Co-overexpression of PFK rescues TDP-43 induced locomotor defects.** (A) TDP-43<sup>WT</sup> or ALS associated TDP-43<sup>G298S</sup> were expressed in MNs (using the GAL4-UAS system together with *Drosophila* UAS-PFK). (B) TDP-43<sup>WT</sup> or ALS associated TDP-43<sup>G298S</sup> were expressed in MNs (using the GAL4-UAS system together with *Drosophila* UAS-PFK<sup>RNAi</sup>). N = 30 larvae. Kruskal-Wallis was used to determine statistical significance. \* - P<sub>value</sub> < .05, \*\* - P<sub>value</sub> < 0.01, \*\*\* - P<sub>value</sub> < 0.001.

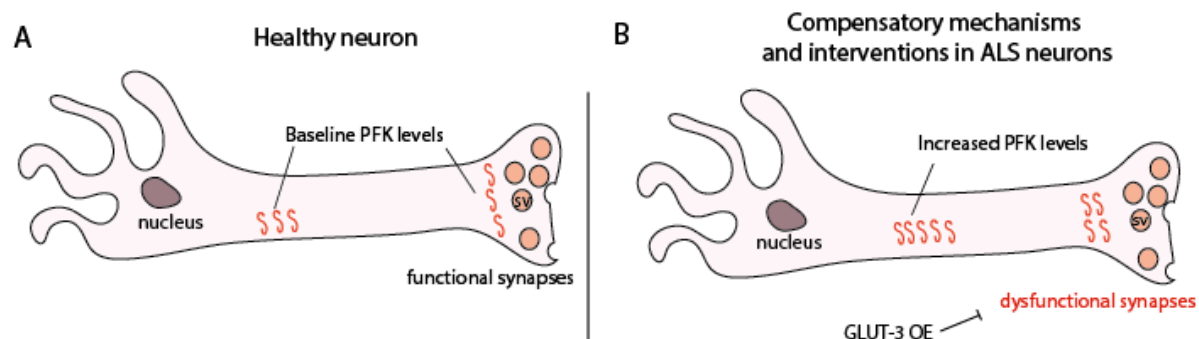

**Figure 7. Proposed model showing PFK transcript levels increase in response to TDP-43 proteinopathy.** (A) Neurons from non-diseased patients. (B) ALS neurons showing an increase in PFK transcript levels. SV – synaptic vesicle.

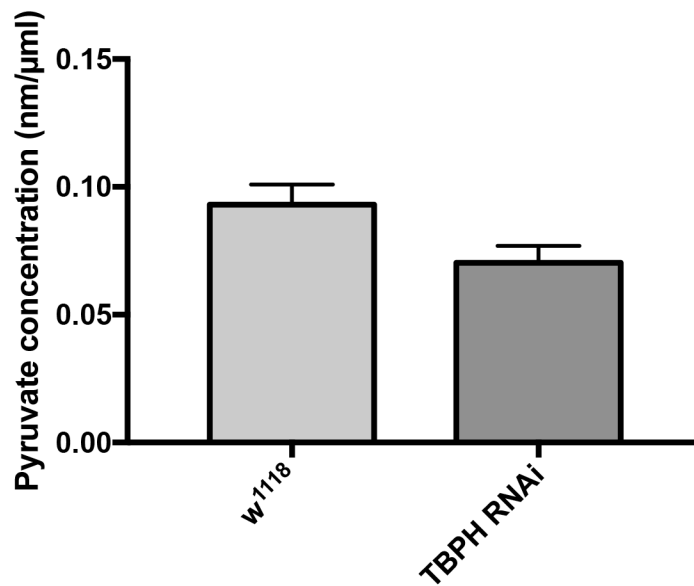

**Figure 1 – figure supplement 1**

Pyruvate measurements in whole larvae expressing RNAi knock-down constructs for the endogenous *Drosophila* TDP-43 (TBPH) with the D42 GAL driver show no significant changes compared to w<sup>1118</sup> controls.  $P_{\text{value}}=0.092$  (Student's t test).

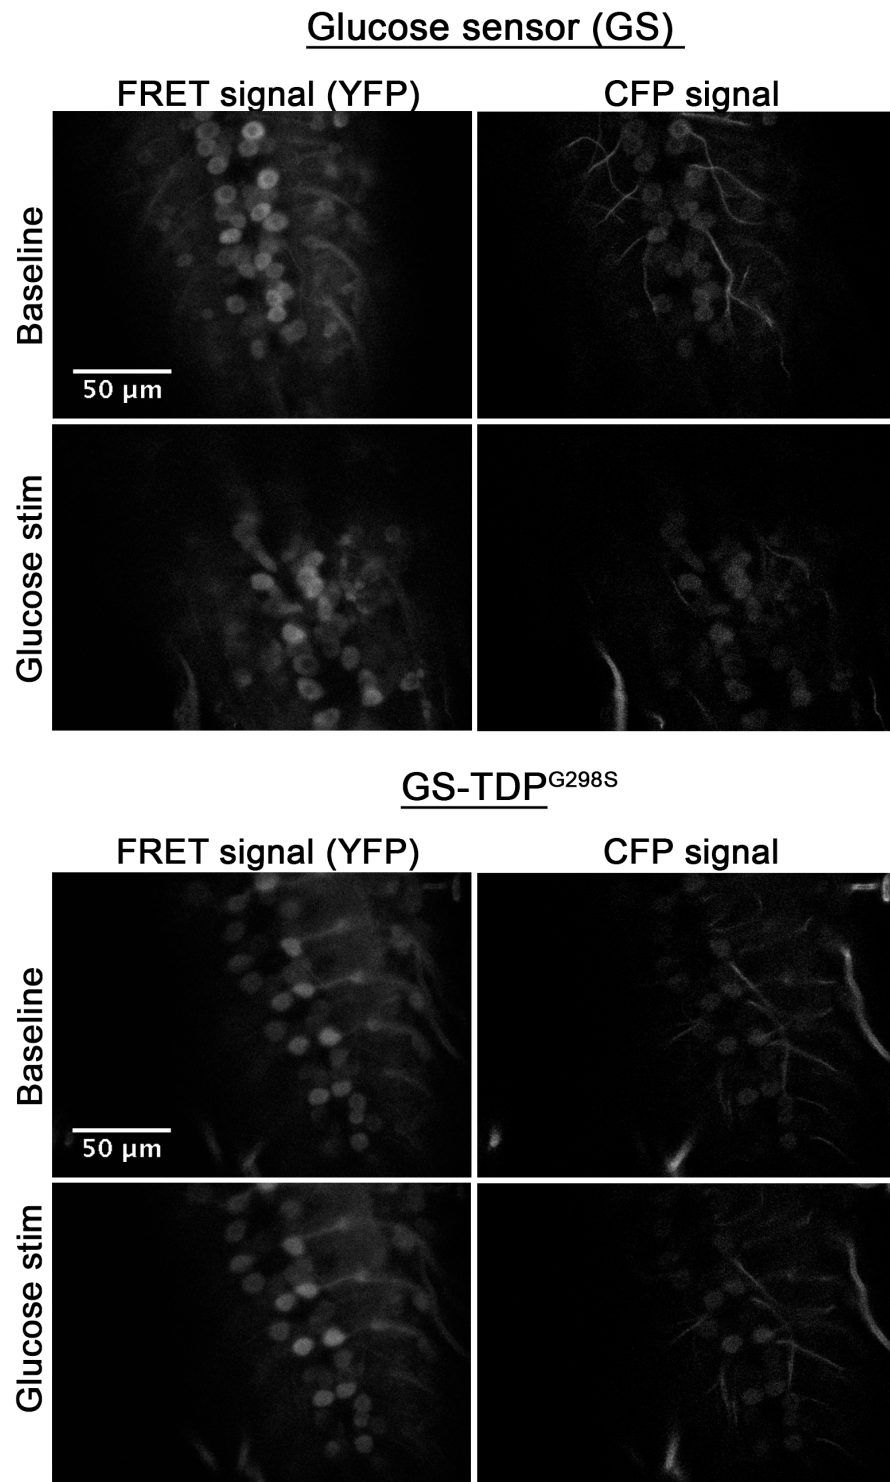

**Figure 3 – figure supplement 1**

Raw images of glucose sensor **(A)** or glucose sensor in the context of TDP-43<sup>G298S</sup> **(B)**.

Sections shown are taken through the ventral nerve cord 7.5 min post mounting (baseline) and

7.5 min post stimulation (Glucose stim), as indicated. See Materials and Methods for details on

imaging and analyses. Scale bar as shown.

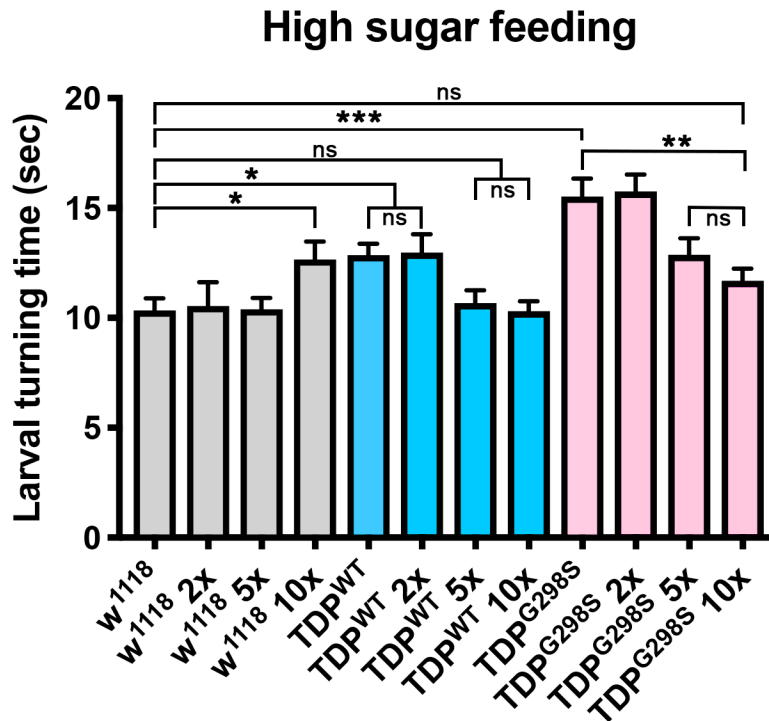

**Figure 4 – figure supplement 1**

Larval turning assays on regular cornmeal-molasses food supplemented with various amounts of glucose (2X, 5X or 10X, as shown). Genotypes as indicated. N=30 larvae. Kruskal-Wallis test was used to determine statistical significance.

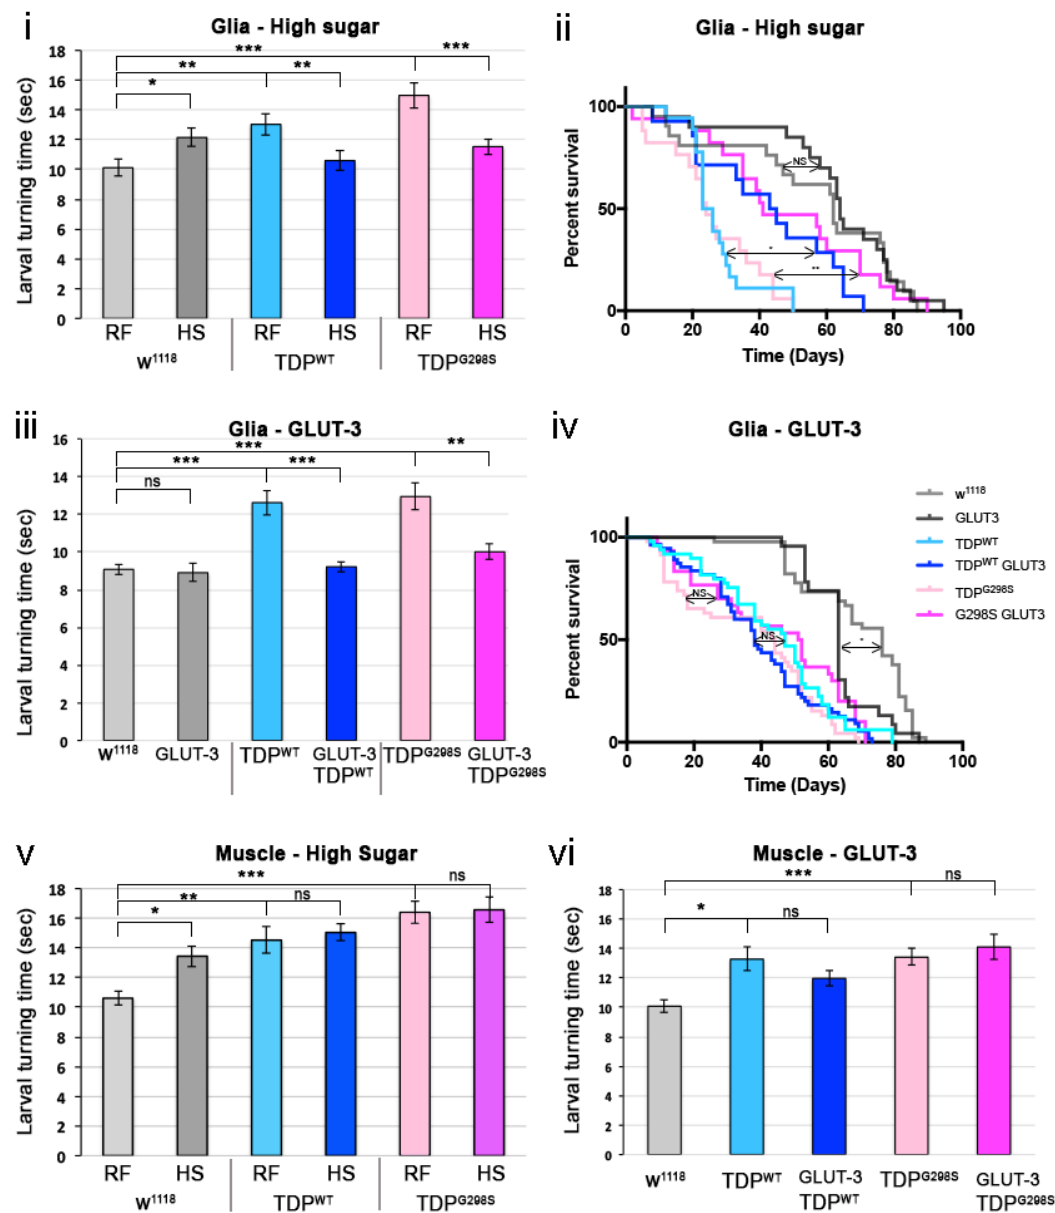

**Figure 4 – figure supplement 2**

(i, ii) Larval turning assays (i) and lifespan assays (ii) on a high sugar diet (HS) compared to a regular sugar diet (RF). Genotypes as indicated. (iii and iv) Larval turning assays (iii) and lifespan assays (iv) for GLUT-3 overexpression alone or in conjunction with TDP-43. Genotypes as indicated. (v and vi) Larval turning assays on HS versus RF (v) or in the context of GLUT-3 and TDP-43 overexpression in muscles (vi). Kruskal-Wallis test was used for larval turning assays and Log-rank or Mantel-Cox tests were used for lifespan assays to determine significance.

# **Figure 4 – figure supplement 3**

Negative geotaxis assay on adult flies expressing TDP-43<sup>WT</sup> or TDP-43<sup>G298S</sup> alone or in conjunction with GLUT-3. The percent of flies that reach the top of the column are shown after 60 sec. Gene expression was specifically targeted in all neurons by using the elav GAL4 driver. Statistical comparisons were performed using one-way ANOVA followed by Tukey's multiple-comparison test.

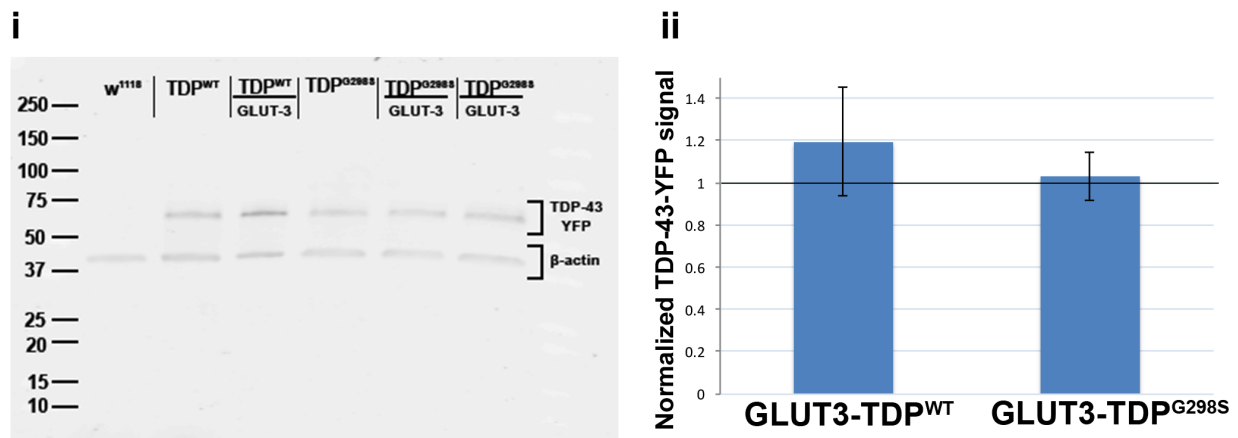

# **Figure 4 – figure supplement 4**

i. Western blot of ventral nerve cords probing for TDP-43-YFP and  $\beta$ -actin. D42 motor neuron driver was used to express TDP-43 in motor neurons. ii. Quantification of 3 western blot bioreplicates. Protein levels measured by GFP western blot (to detect TDP-YFP) are shown as a ratio between GLUT-3-TDP<sup>WT</sup>-YFP to TDP<sup>WT</sup>-YFP alone and GLUT-3-TDP<sup>G298S</sup>-YFP to TDP<sup>G298S</sup>-YFP alone.

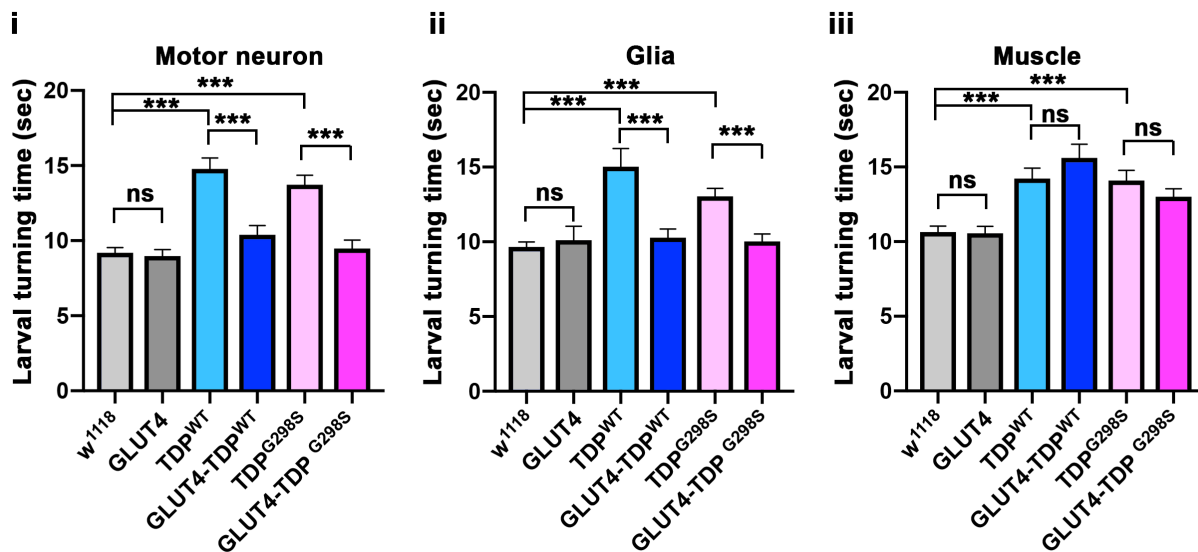

**Figure 4 – figure supplement 5**

Larval turning assays for GLUT-4 and TDP-43 overexpression in motor neurons (i), glia (ii) or muscles (iii). Genotypes as indicated. N=30 larvae. Kruskal-Wallis test was used to determine statistical significance.



781

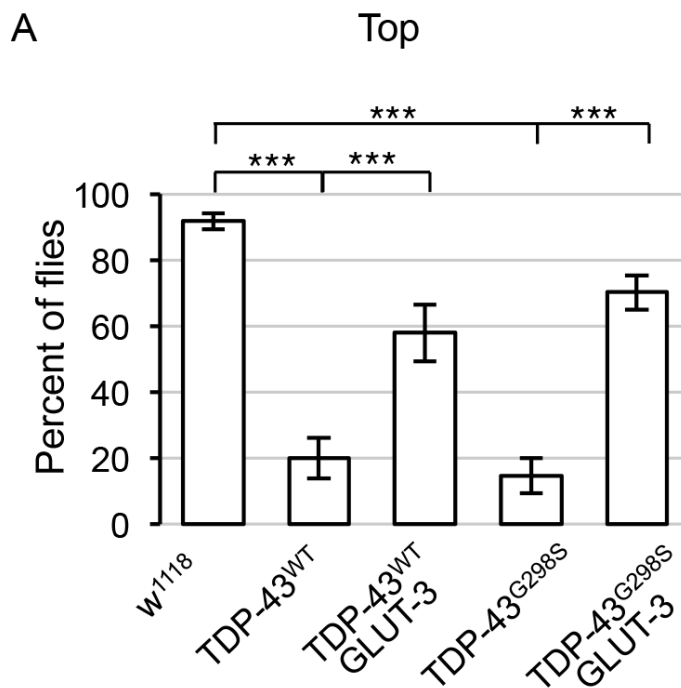

782

783 **Supplemental Figure 4D.** Negative geotaxis assay on adult flies expressing TDP-  
784 43WT or TDP-43G298S alone or in conjunction with GLUT-3. The percent of flies that  
785 reach the top (A) of the column are shown after 60 sec. Gene expression was  
786 specifically targeted in all neurons by using the elav GAL4 driver. Statistical  
787 comparisons were performed using one-way ANOVA followed by Tukey's multiple-  
788 comparison test.

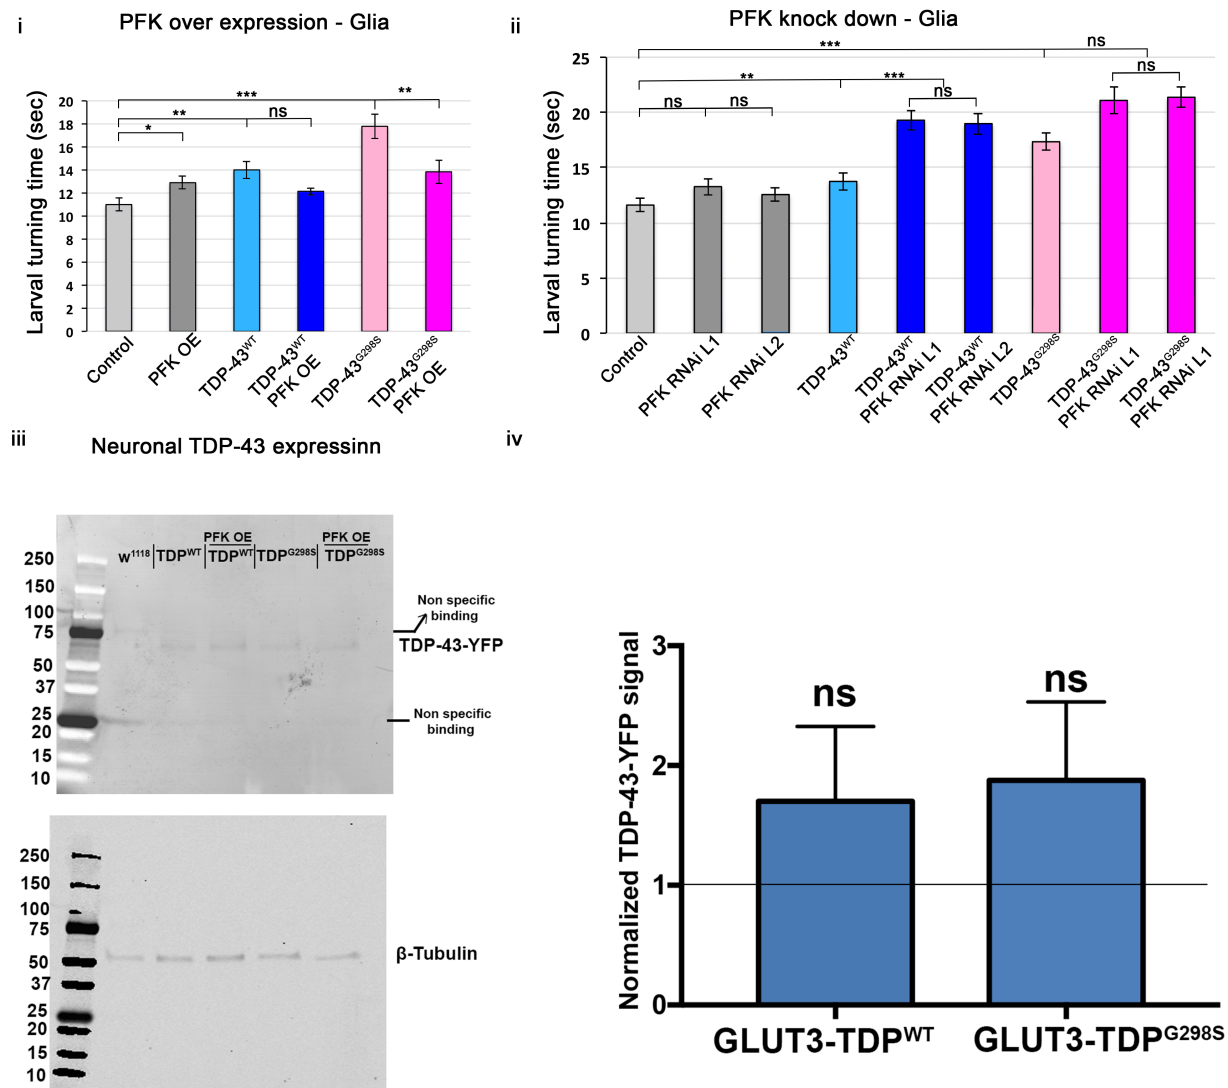

**Figure 6 – figure supplement 1**

Larval turning assays for PFK overexpression (i) or RNAi (ii) in the context of TDP-43 in glia. Genotypes as indicated. N=30 larvae. Kruskal-Wallis test was used to determine statistical significance. iii. Western blot of ventral nerve cords probing for TDP-43-YFP and tubulin. D42 motor neuron driver was used to express TDP-43 in motor neurons. ii. Quantification of 3 western blot bioreplicates. Protein levels measured by GFP western blot (to detect TDP-YFP) are shown as a ratio between PFK OE - TDP<sup>WT</sup>-YFP to TDP<sup>WT</sup>-YFP alone and PFK OE - TDP<sup>G298S</sup>-YFP to TDP<sup>G298S</sup>-YFP alone.

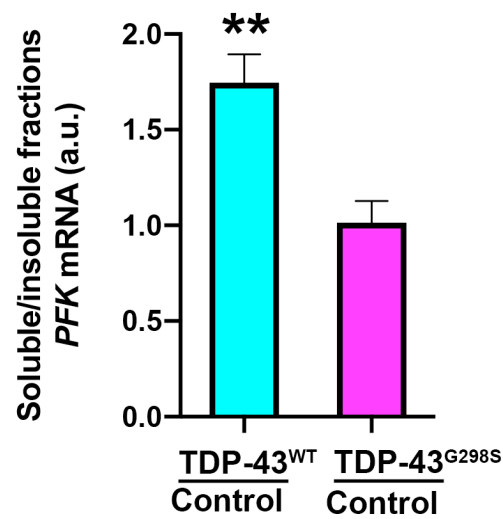

**Figure 7 – figure supplement 1**

Cellular fractionations from third instar larvae. TDP<sup>WT</sup> (A) or TDP<sup>G298S</sup> (B) were fractionated (see supplemental materials and methods above) and PFK transcript levels in the urea fraction were quantified and normalized to controls ( $w^{1118}$ ). Wilcoxon ranked sum test was used to perform statistics.

|                                                      | Biochemical name                | TDP <sup>WT</sup><br>control | P <sub>value</sub> | TDP <sup>G298S</sup><br>control | P <sub>value</sub> |
|------------------------------------------------------|---------------------------------|------------------------------|--------------------|---------------------------------|--------------------|
| Glycolysis, Gluconeogenesis, and Pyruvate Metabolism | glucose                         | 0.85                         | 0.0003             | 0.95                            | 0.2562             |
|                                                      | glucose-6-phosphate (G6P)       | 1.13                         | 0.697              | 1.37                            | 0.1516             |
|                                                      | glucose 1-phosphate             | 0.83                         | 0.4723             | 0.87                            | 0.5666             |
|                                                      | fructose-6-phosphate            | 1.29                         | 0.5165             | 1.35                            | 0.235              |
|                                                      | 2-phosphoglycerate              | 0.77                         | 0.9454             | 1.05                            | 0.5316             |
|                                                      | 3-phosphoglycerate              | 1.03                         | 0.9916             | 0.98                            | 0.5479             |
|                                                      | phosphoenolpyruvate (PEP)       | 3.29                         | 0.0343             | 5.35                            | 0.0016             |
|                                                      | pyruvate                        | 1.67                         | 0.0072             | 1.6                             | 0.0089             |
|                                                      | lactate                         | 0.9                          | 0.2946             | 0.92                            | 0.4443             |
|                                                      | glycerate                       | 1.05                         | 0.5279             | 0.84                            | 0.6078             |
| Pentose Phosphate Pathway                            | 6-phosphogluconate              | 0.62                         | 0.0174             | 1.1                             | 0.7614             |
|                                                      | sedoheptulose-7-phosphate       | 1.16                         | 0.5718             | 2.38                            | 0.0084             |
|                                                      | ribulose/xylulose 5-phosphate   | 0.79                         | 0.211              | 0.58                            | 0.0107             |
| Pentose Metabolism                                   | ribulose                        | 1.13                         | 0.1944             | 0.91                            | 0.8221             |
|                                                      | ribose                          | 1.3                          | 0.0543             | 0.9                             | 0.7074             |
|                                                      | ribitol                         | 0.61                         | 0.0433             | 0.58                            | 0.0332             |
|                                                      | ribonate                        | 0.95                         | 0.6298             | 1.03                            | 0.7813             |
|                                                      | xylonate                        | 0.73                         | 0.0615             | 1.11                            | 0.7787             |
|                                                      | xylose                          | 0.9                          | 0.6029             | 0.75                            | 0.171              |
|                                                      | xylitol                         | 0.89                         | 0.1002             | 0.85                            | 0.0266             |
|                                                      | threitol                        | 1.4                          | 0.4369             | 2.18                            | 0.0355             |
|                                                      | arabitol                        | 1.09                         | 0.5878             | 1.3                             | 0.194              |
| Glycogen Metabolism                                  | maltopentaose                   | 0.86                         | 0.4789             | 1.23                            | 0.3532             |
|                                                      | maltotetraose                   | 0.95                         | 0.8841             | 0.98                            | 0.8168             |
|                                                      | maltotriose                     | 1.02                         | 0.9606             | 0.95                            | 0.7228             |
|                                                      | maltose                         | 0.85                         | 0.0094             | 0.97                            | 0.6114             |
|                                                      | isomaltose                      | 0.83                         | 0.2842             | 0.91                            | 0.6496             |
| Disaccharides and Oligosaccharides                   | trehalose                       | 1.17                         | 0.1078             | 1.04                            | 0.6138             |
| Fructose, Mannose and Galactose Metabolism           | fructose                        | 1.1                          | 0.4677             | 1.05                            | 0.7955             |
|                                                      | sorbose                         | 1.16                         | 0.3647             | 1.11                            | 0.4997             |
|                                                      | sorbitol                        | 0.8                          | 0.0935             | 0.81                            | 0.1236             |
|                                                      | mannose                         | 0.84                         | 0.297              | 0.98                            | 0.9304             |
|                                                      | mannose-6-phosphate             | 1.15                         | 0.6242             | 1.38                            | 0.1272             |
|                                                      | galactose 1-phosphate           | 0.78                         | 0.3283             | 0.92                            | 0.82               |
|                                                      | galactonate                     | 0.76                         | 0.0366             | 0.95                            | 0.8452             |
| Nucleotide Sugar                                     | UDP-glucuronate                 | 0.82                         | 0.4406             | 0.85                            | 0.5114             |
|                                                      | UDP-N-acetylglucosamine         | 0.76                         | 0.0224             | 0.86                            | 0.2222             |
| Aminosugar Metabolism                                | glucosamine-6-phosphate         | 0.94                         | 0.911              | 1.33                            | 0.1329             |
|                                                      | glucuronate                     | 0.83                         | 0.007              | 0.6                             | 1.18E-09           |
|                                                      | N-acetylglucosamine             | 0.76                         | 0.0519             | 0.8                             | 0.1516             |
|                                                      | N-acetylglucosamine 6-phosphate | 0.68                         | 2.24E-05           | 0.84                            | 0.0424             |

**Supplemental file 1. Summary of carbohydrate metabolites in TDP-43<sup>WT</sup> and TDP-43<sup>G298S</sup> compared to w<sup>1118</sup> controls.** Altered metabolites in third instar larvae crossed with the motor neuron driver D42 GAL4 were measured using gas or liquid chromatography followed by mass spectrometry. Red and green colored cells indicate statistically significant changes ( $P_{\text{value}} < 0.05$ ) that are increased and decreased, respectively. Light red and light green colored cells indicate upward or downward trends, respectively ( $P_{\text{value}} < 0.1$ ).

| Group/ID | Race | Gender | Age | PMI (hrs) |
|----------|------|--------|-----|-----------|
| CON 1    | W    | M      | 22  | 6         |
| CON 2    | -    | F      | 71  | 5         |
| CON 3    | -    | M      | 72  | 7         |
| CON 4    | W    | F      | 57  | 32        |
| CON 6    | W    | F      | 53  | 4         |
| CON 7    | W    | F      | 51  | 5         |
| CON 8    | W    | F      | 57  | 11        |
| CON 9    | W    | M      | 76  | 13        |
| ALS 1    | W    | F      | 68  | 1         |
| ALS 2    | W    | M      | 69  | 10        |
| ALS 3    | W    | F      | 73  | 11        |
| ALS 4    | W    | M      | 53  | -         |
| ALS 5    | W    | F      | 62  | 4         |
| ALS 6    | W    | M      | 53  | 5         |
| ALS 7    | W    | F      | 76  | 6         |
| ALS 8    | W    | F      | 63  | 5         |
| ALS 9    | W    | M      | 67  | 8         |

PMI = post-mortem interval; CON = Non-neurologic disease control

**Supplemental file 2.** Summary of demographic information for patient samples used to quantify

PFKP, PFKM and G6PD.

| Cell line number | Passage number | Days in culture |
|------------------|----------------|-----------------|
| ALS 1            | 39             | 69              |
| ALS 2            | 35             | 70              |
| ALS 3            | 36             | 77              |
| Control 1        | 19             | 73              |
| Control 2        | 28             | 74              |
| Control 3        | 37             | 71              |
| Control 4        | 21             | 70              |

**Supplemental file 3.** Summary of iPSC MNs used to quantify PFKP, PFKM and G6PD.

Patient cell lines used for qPCR analysis are shown.
